# Supplementary material for: A computational investigation of ring-shift isomerization of sym-octahydrophenanthrene to sym-octahydroanthracene catalyzed by acidic zeolites
Source: Royal Society of Chemistry journal article supplement (doi:10.1039/c2cp41824j), 2012-01-01
Supplement: c2cp41824j.pdf [file c2cp41824j.pdf]

## Electronic Supplementary Information (ESI)

### A Computational Investigation of Ring-Shift Isomerization of *sym*-Octahydrophenanthrene into *sym*-Octahydroanthracene Catalyzed by Acidic Zeolites

Xiaowa Nie,<sup>ab</sup> Michael J. Janik,<sup>\*bc</sup> Xinwen Guo<sup>a</sup> and Chunshan Song<sup>\*abc</sup>

<sup>a</sup>State Key Laboratory of Fine Chemicals, PSU-DUT Joint Center for Energy Research, School of Chemical Engineering, Dalian University of Technology, Dalian, 116012, China

<sup>b</sup>EMS Energy Institute, PSU-DUT Joint Center for Energy Research, and Department of Energy & Mineral Engineering, Pennsylvania State University, University Park, PA 16802, USA

<sup>c</sup>Department of Chemical Engineering, Pennsylvania State University, University Park, PA 16802, USA

**Fig. S1** The terminology used in definition of the *S*-value for the level/model combination in an ONIOM scheme. (Blue: silicon; red: oxygen; pink: aluminum; white: hydrogen.)

$$S(\text{level}) = E(\text{level, real}) - E(\text{level, model})$$

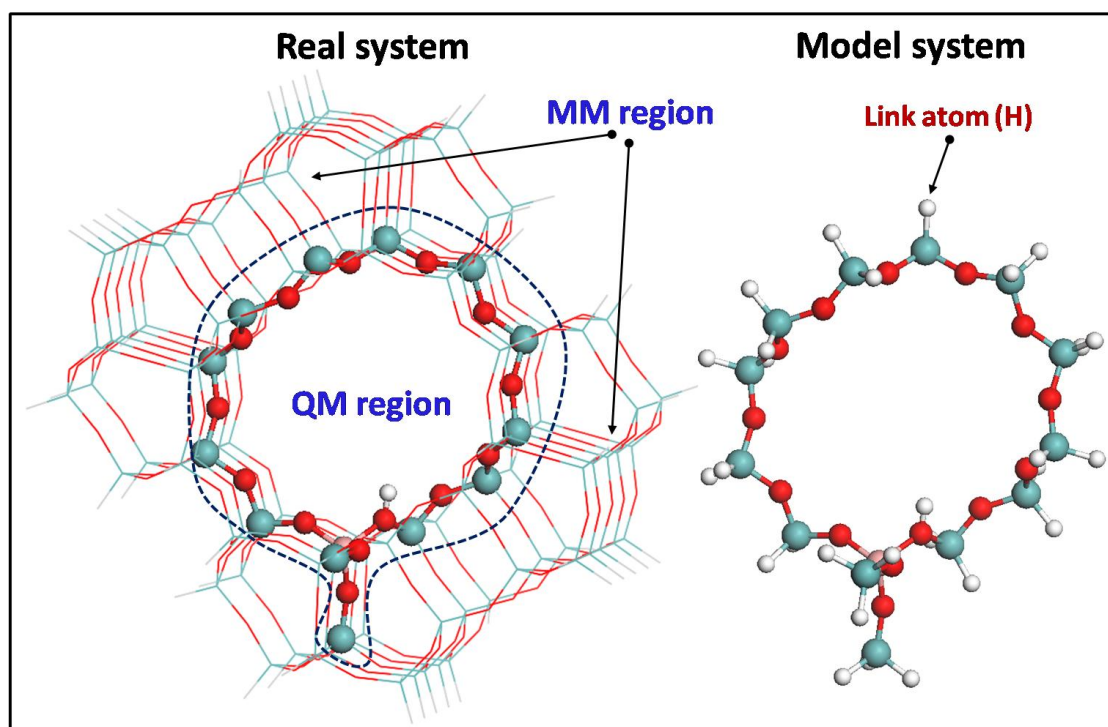

**Fig. S2** Optimized geometries of *sym*-OHP and *sym*-OHA molecular configurations in the gas phase.

**(a) Gas phase structures of *sym*-OHP conformers**

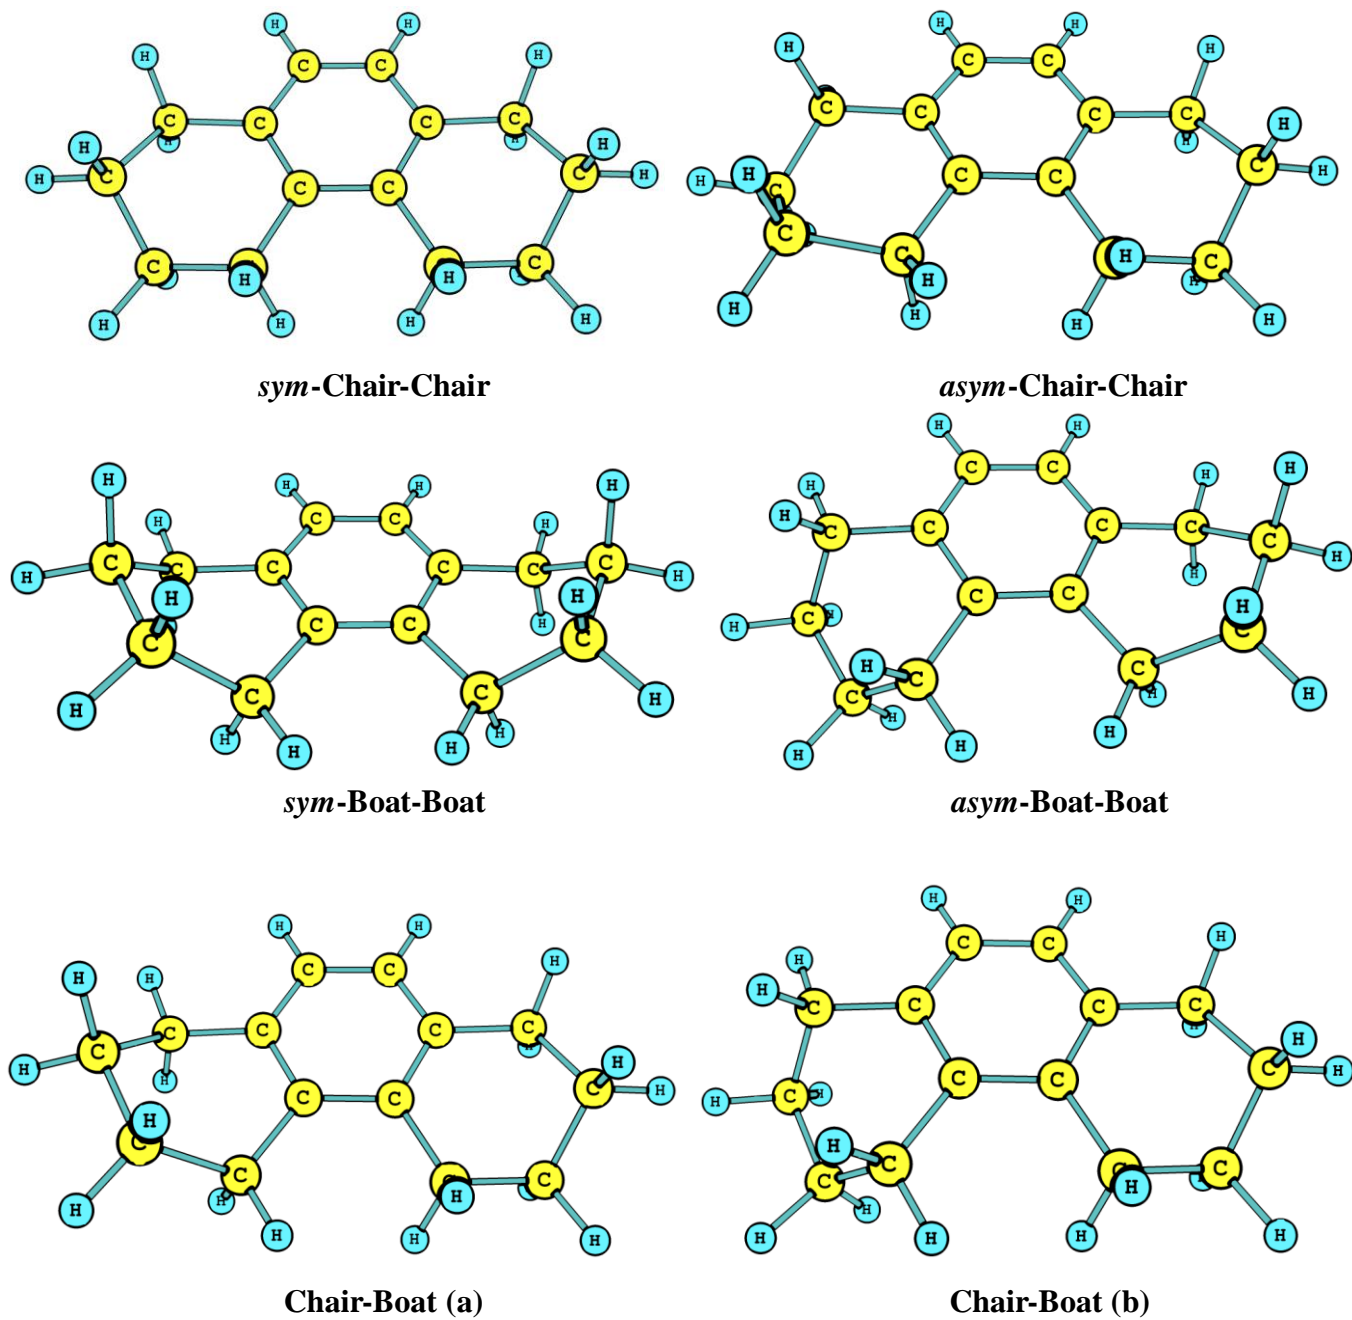

**(b) Gas phase structures of *sym*-OHA conformers**

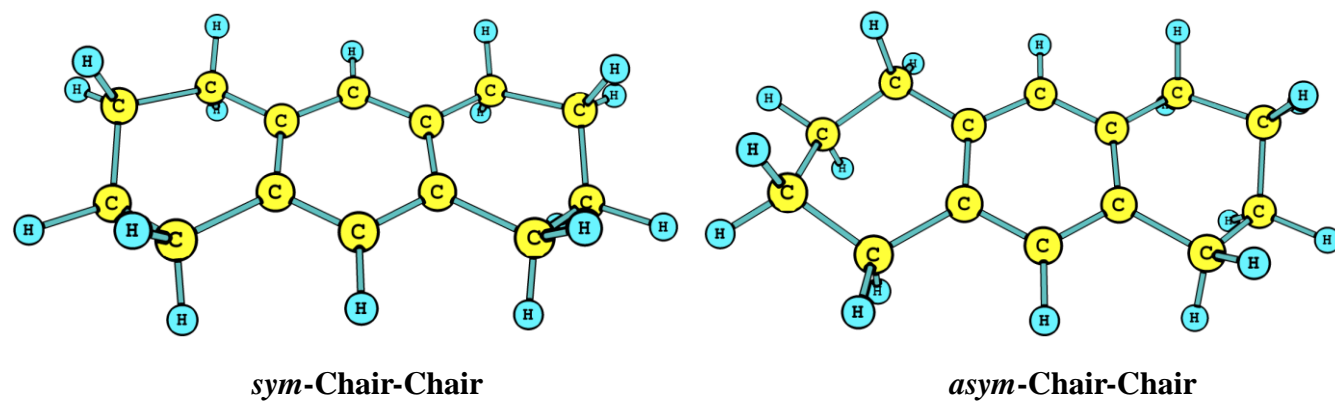

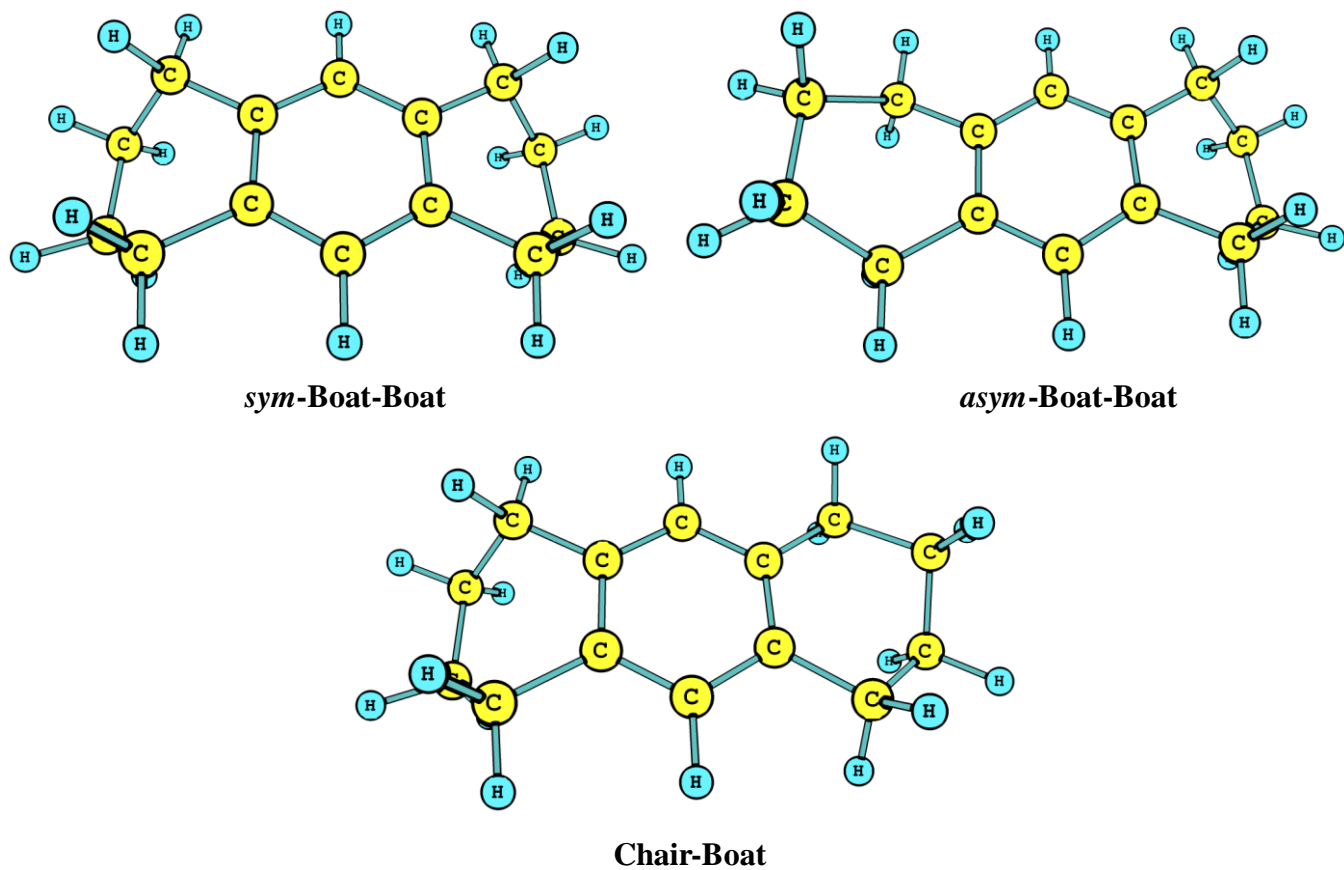

**Fig. S3** All the possible adsorbed structures of *sym*-OHP and *sym*-OHA over the 120T Al-H-MOR.  
(a) Adsorbed *sym*-OHP structures

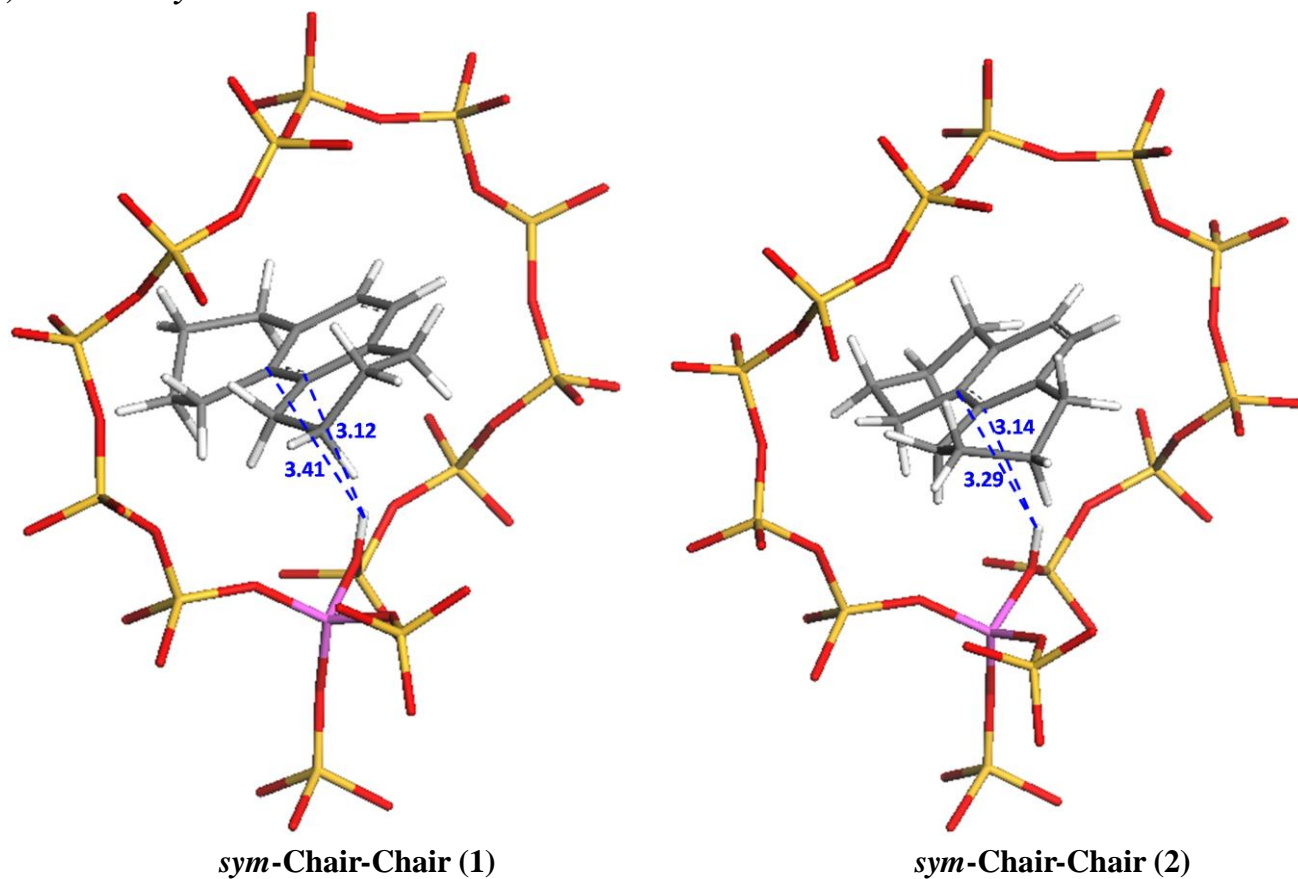

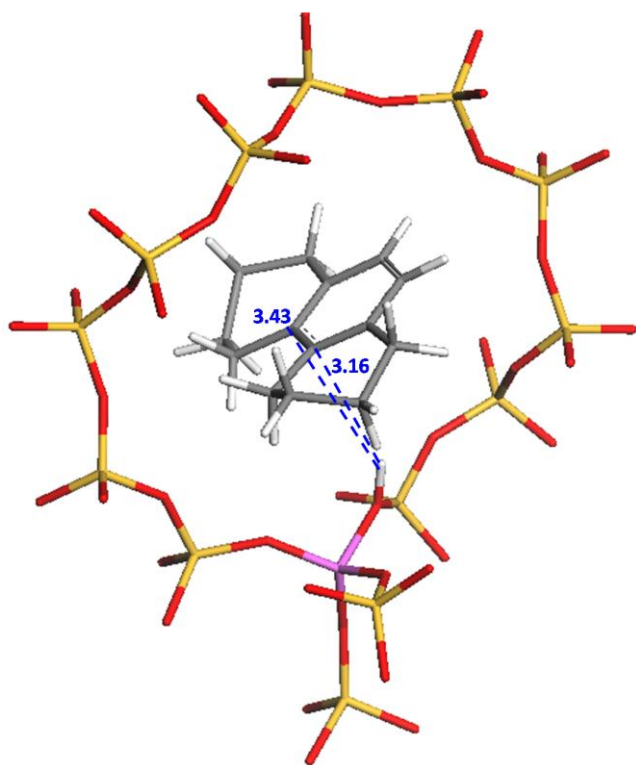

*asym-Chair-Chair* (1)

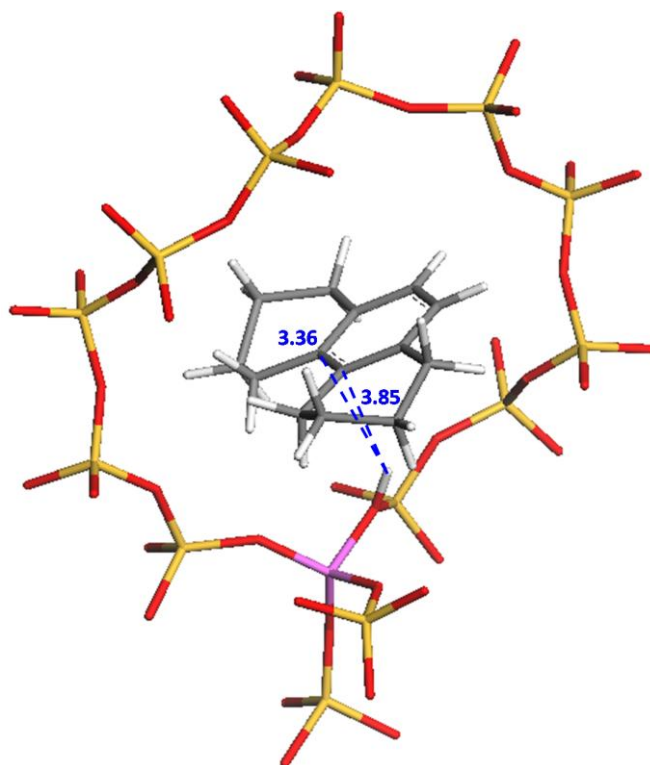

*asym-Chair-Chair* (2)

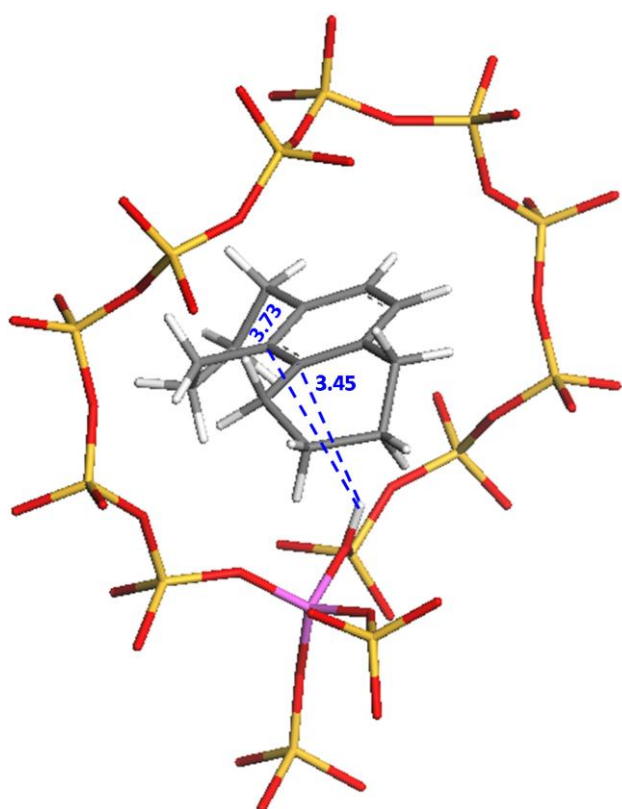

*sym-Boat-Boat* (1)

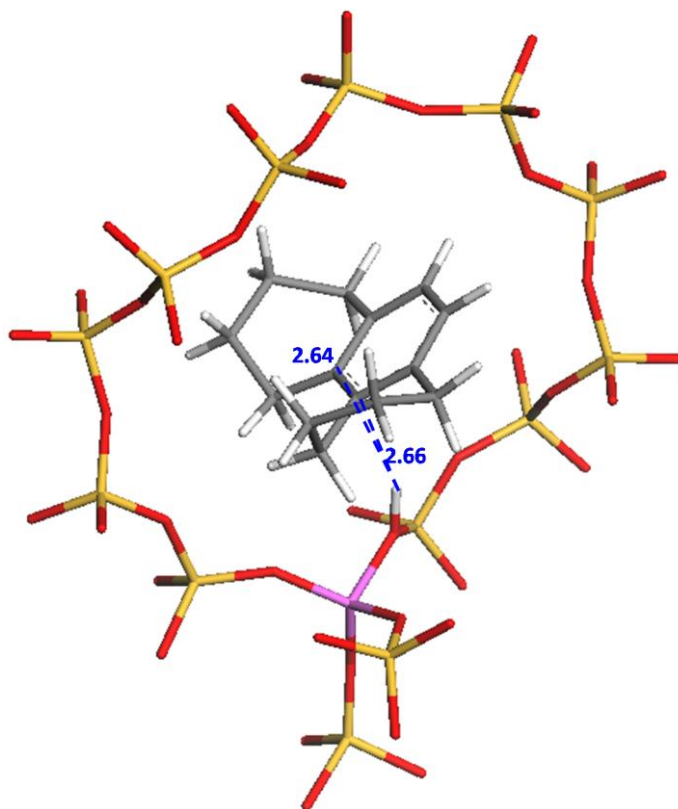

*sym-Boat-Boat* (2)

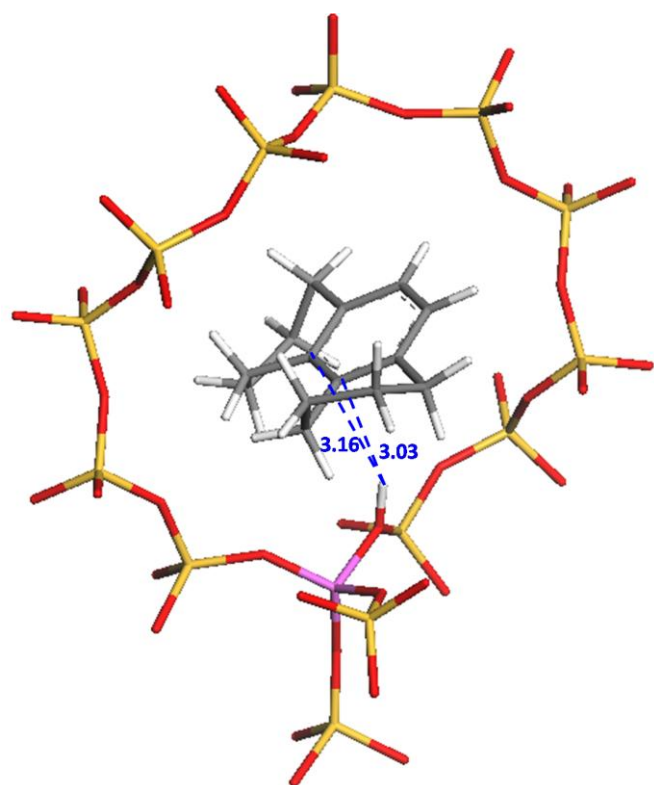

*asym-Boat-Boat* (1)

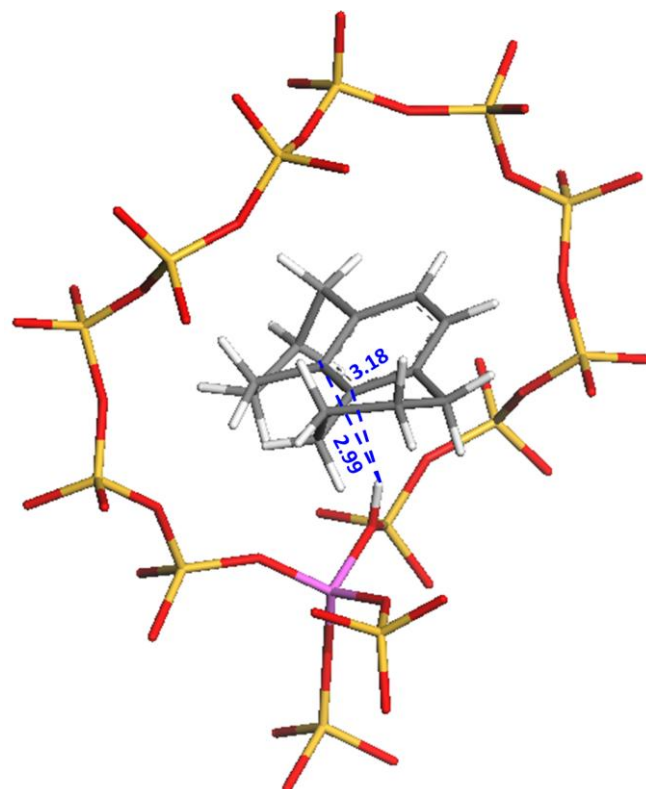

*asym-Boat-Boat* (2)

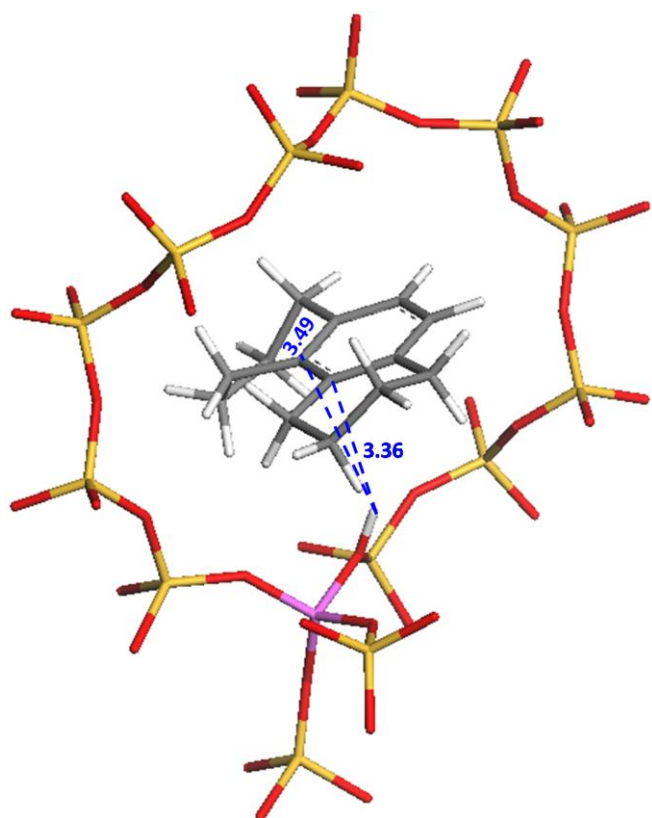

Chair-Boat (1)

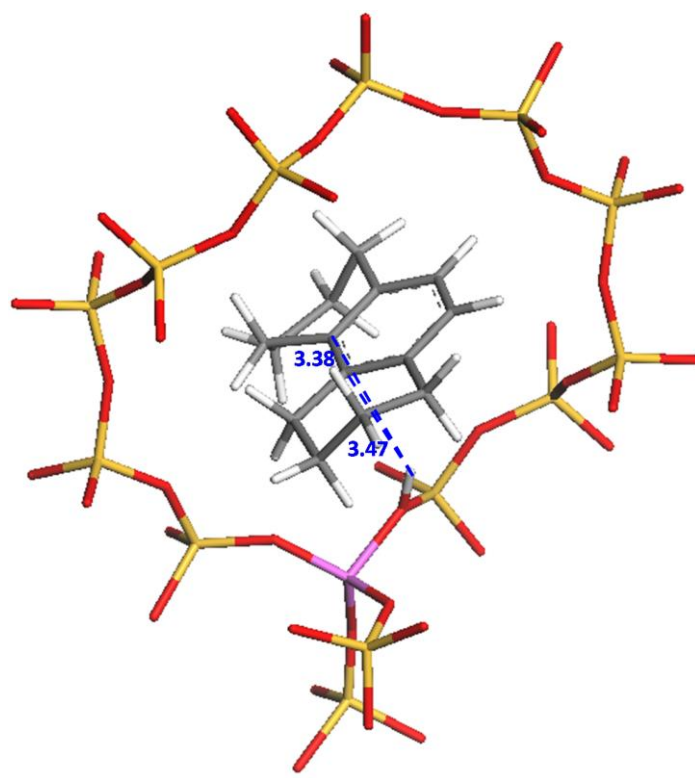

Chair-Boat (2)

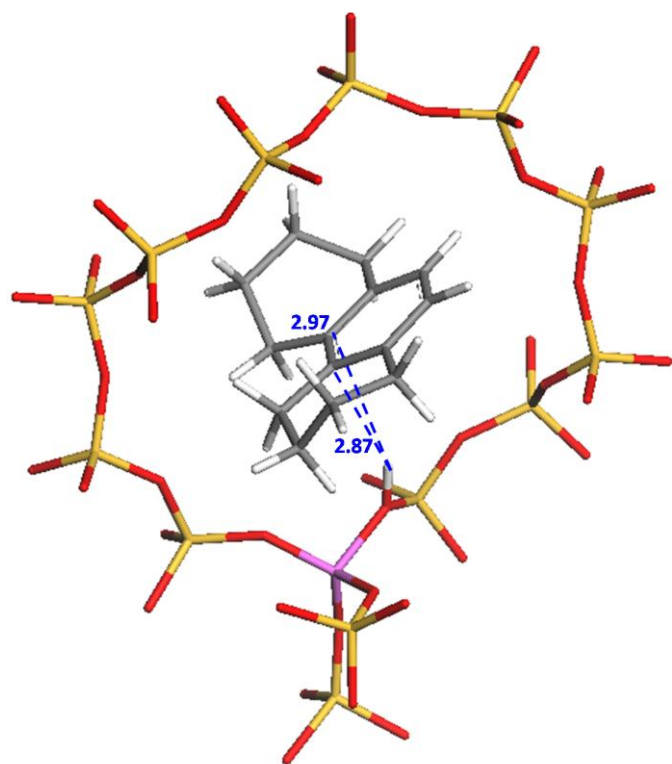

**Chair-Boat (3)**

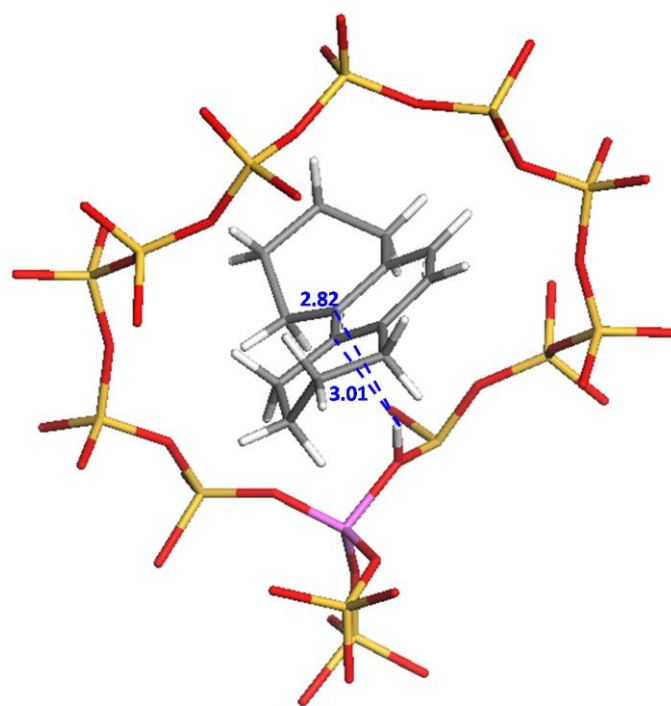

**Chair-Boat (4)**

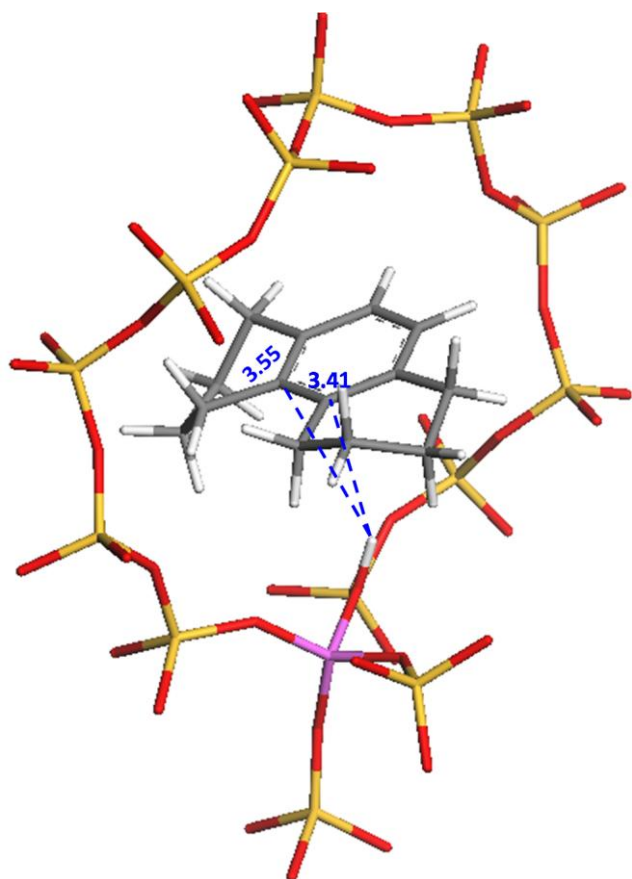

**Chair-Boat (5)**

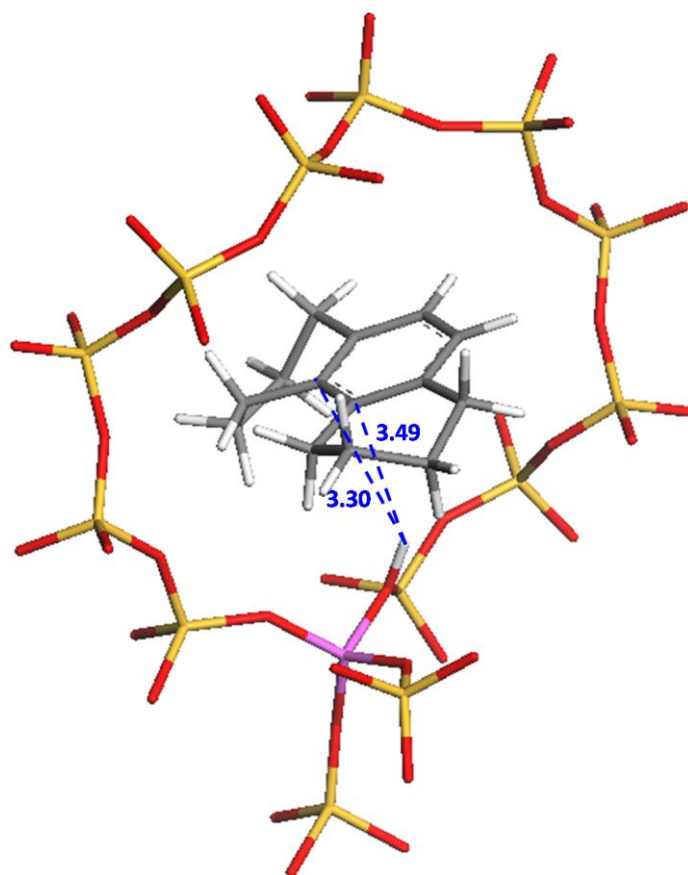

**Chair-Boat (6)**

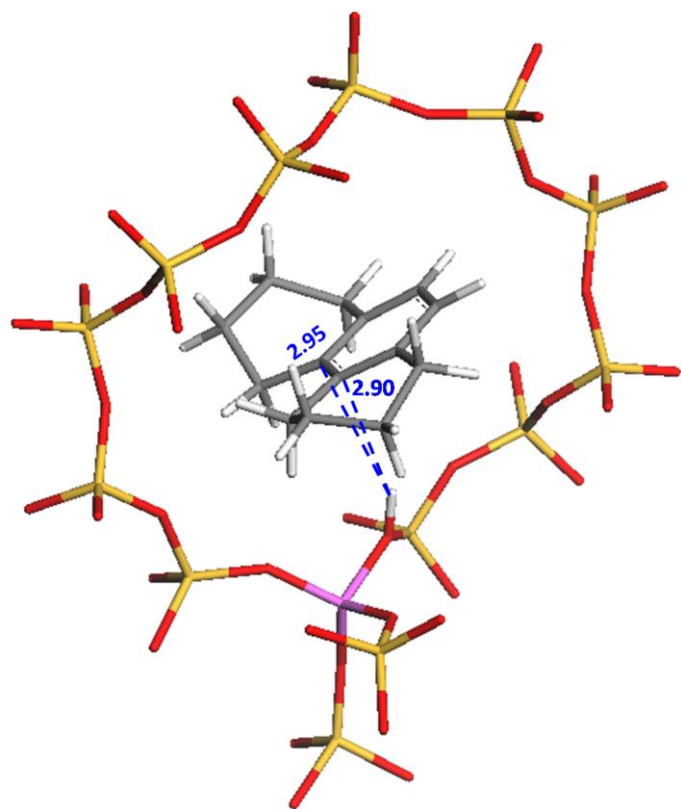

**Chair-Boat (7)**

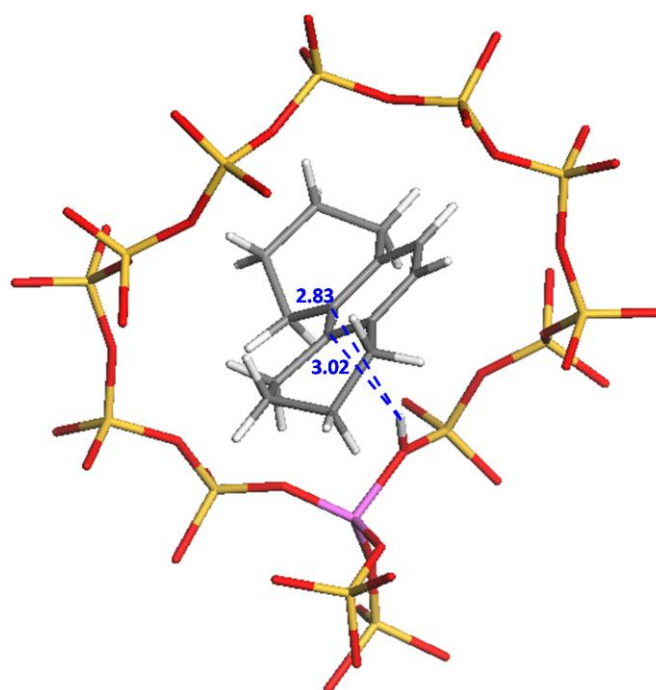

**Chair-Boat (8)**

**(b) Adsorbed *sym*-OHA structures**

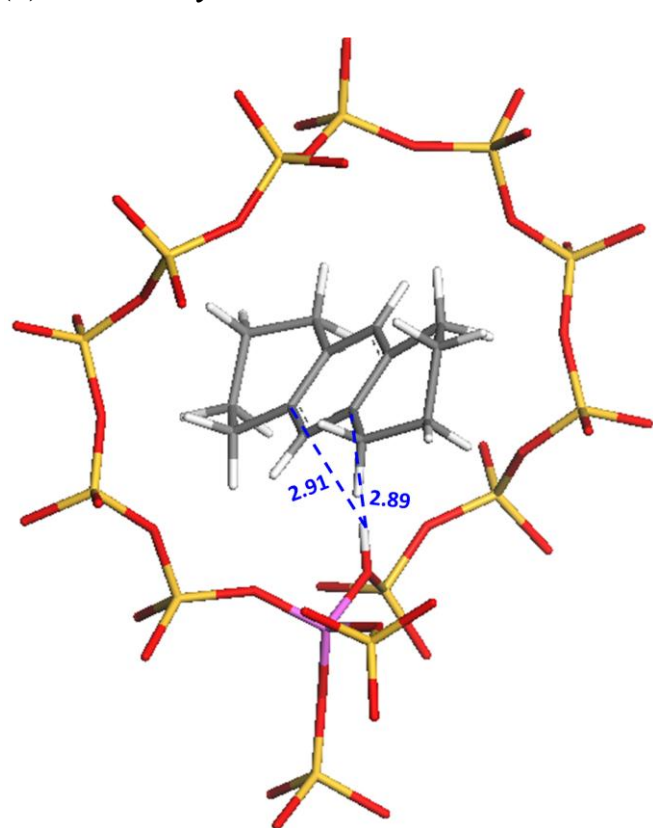

***sym*-Chair-Chair (1)**

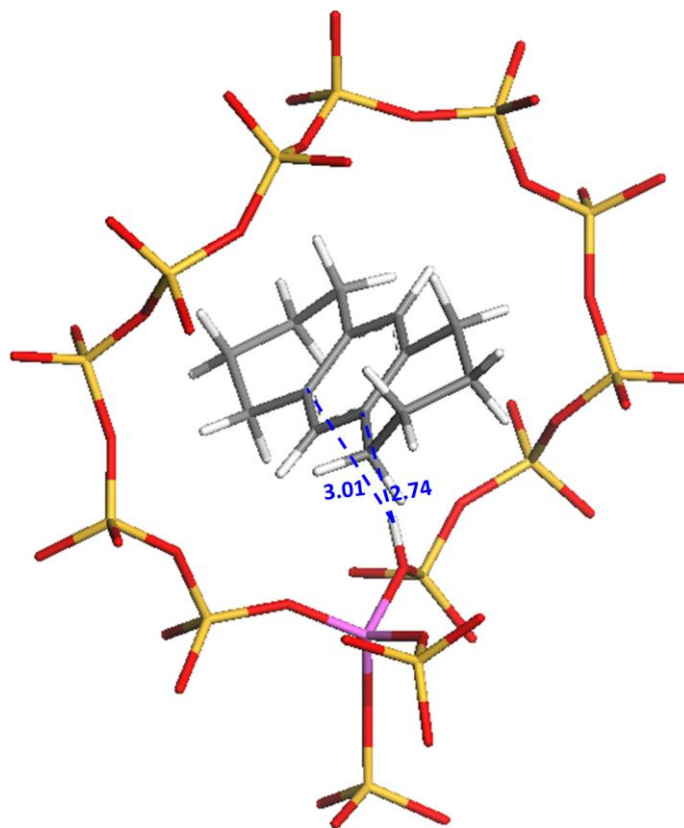

***sym*-Chair-Chair (2)**

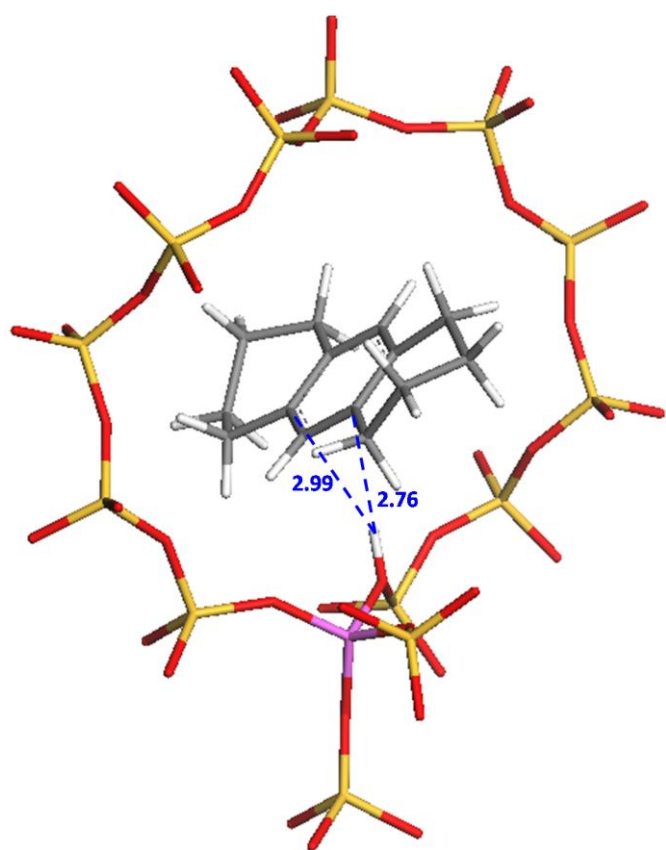

*asym-Chair-Chair* (1)

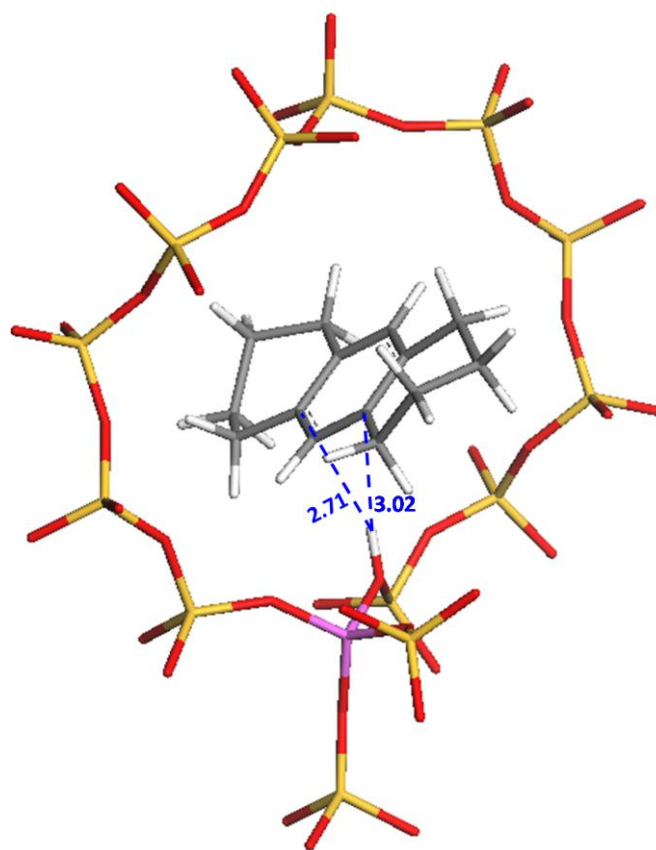

*asym-Chair-Chair* (2)

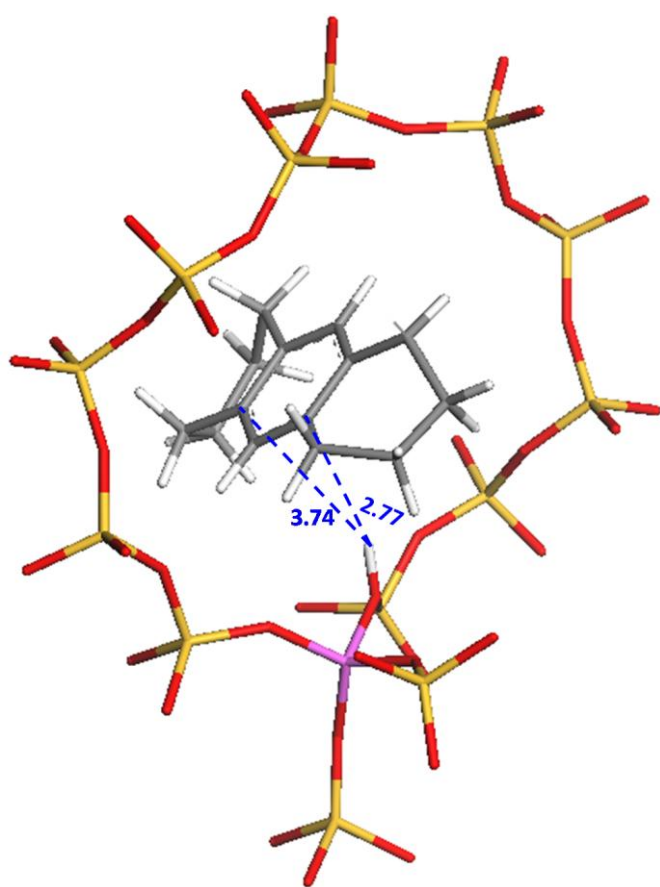

*sym-Boat-Boat* (1)

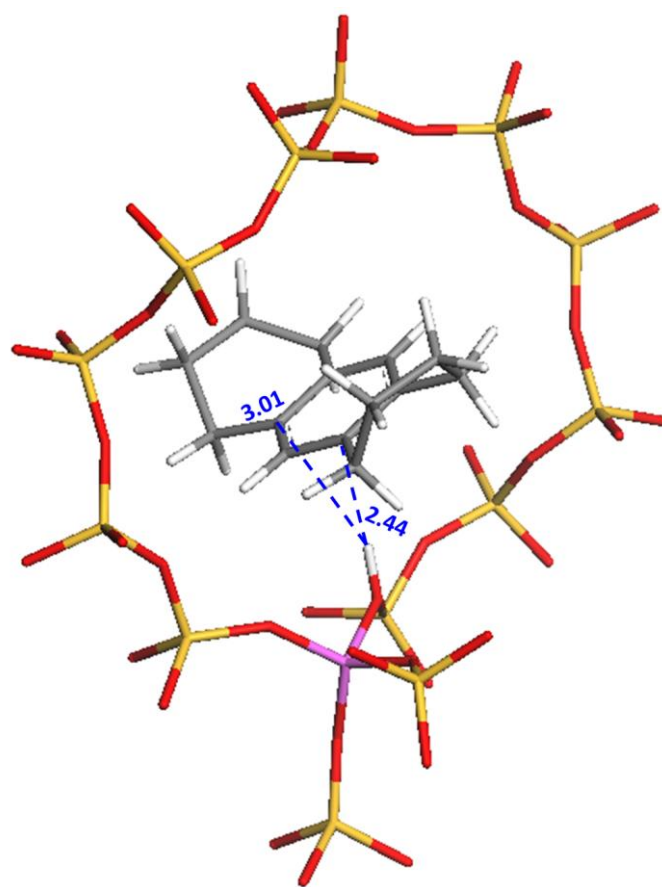

*sym-Boat-Boat* (2)



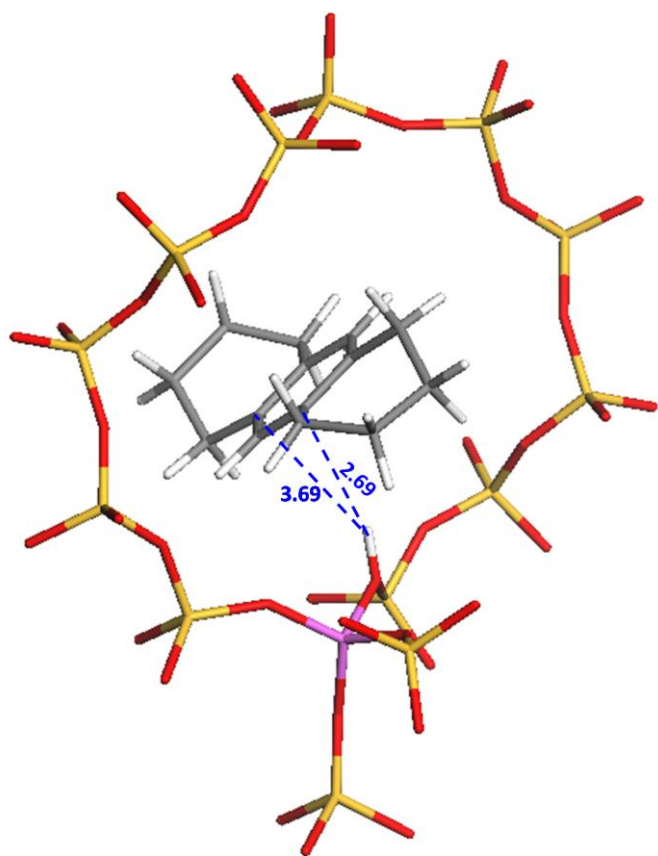

***asym-Boat-Boat* (1)**

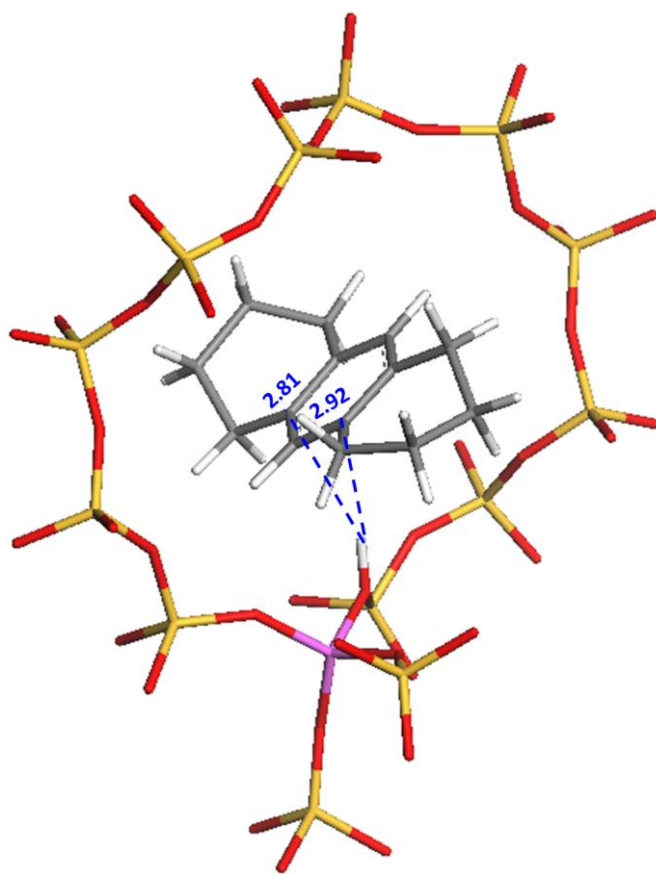

***asym-Boat-Boat* (2)**

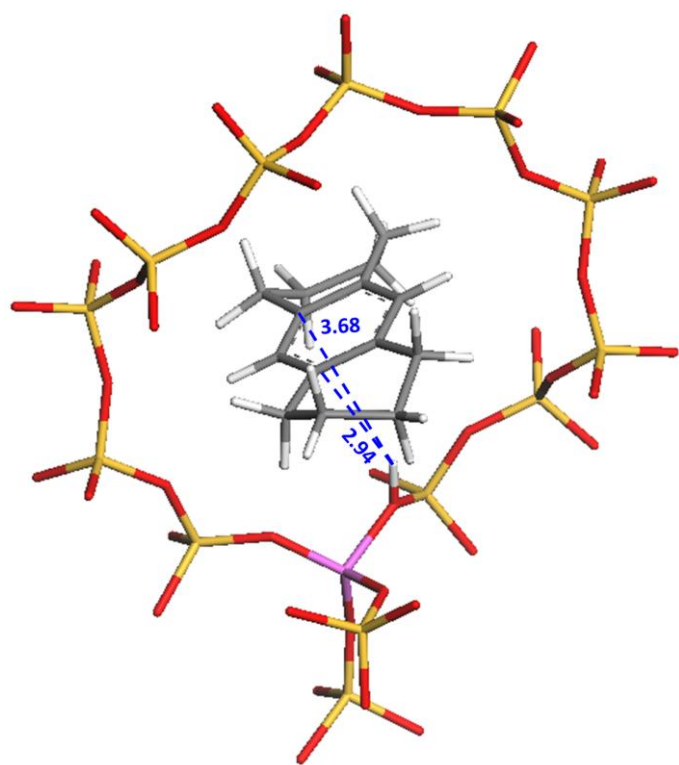

**Chair-Boat (1)**

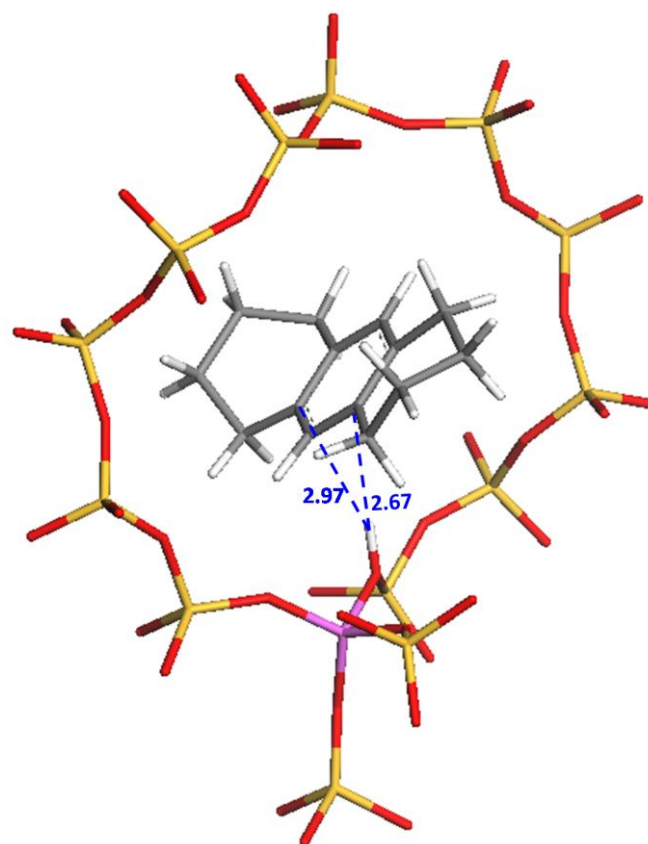

**Chair-Boat (2)**

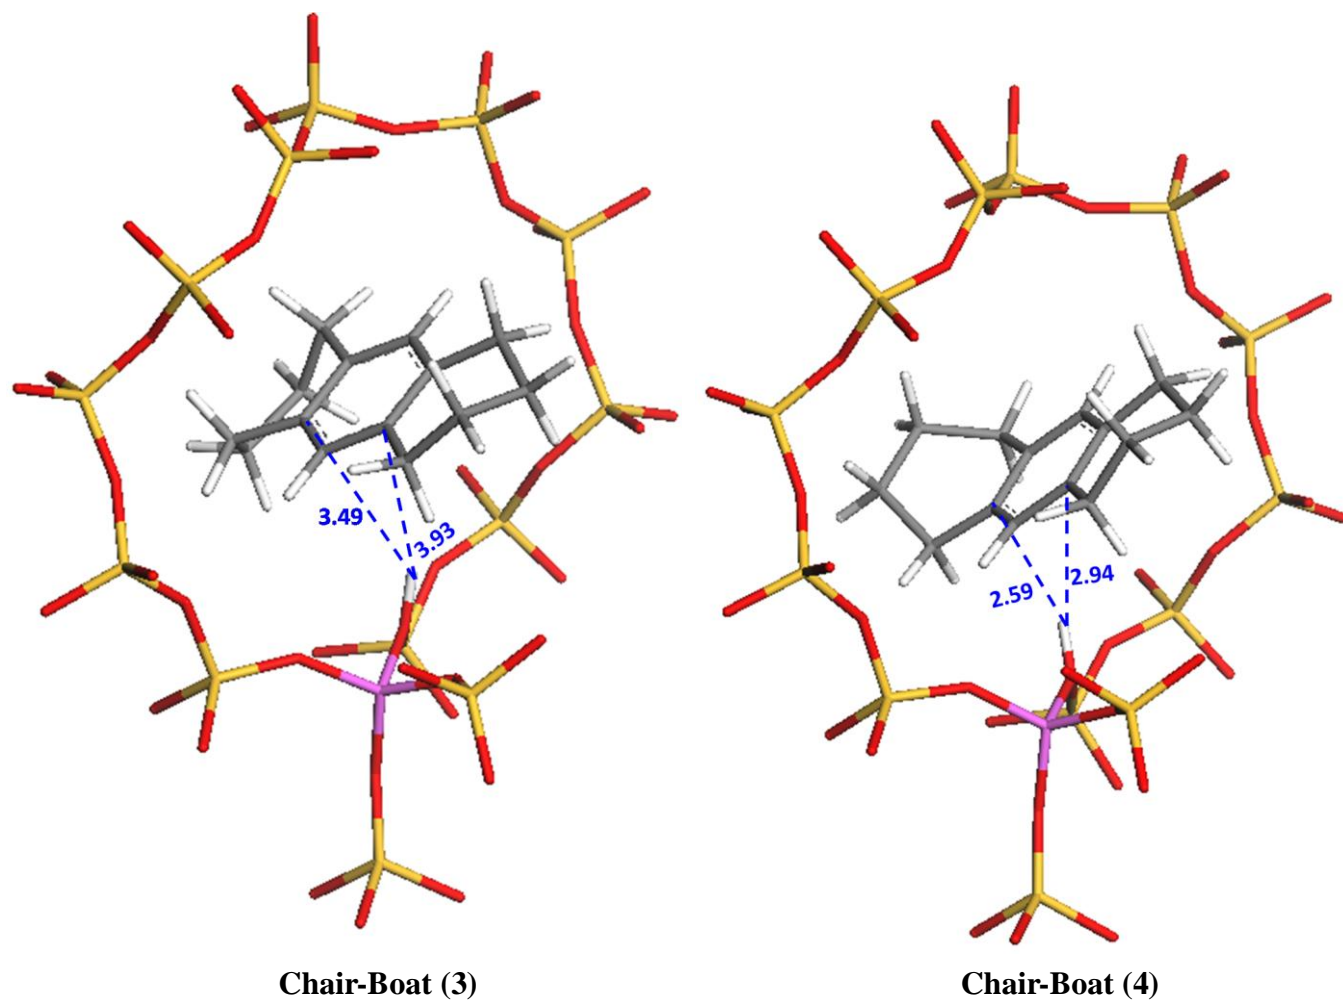

**Fig. S4** Atom label reference structures.

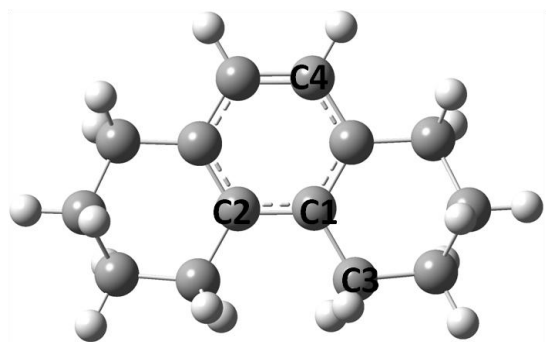

**(a)** reference structures for the “six-membered ring” mechanism

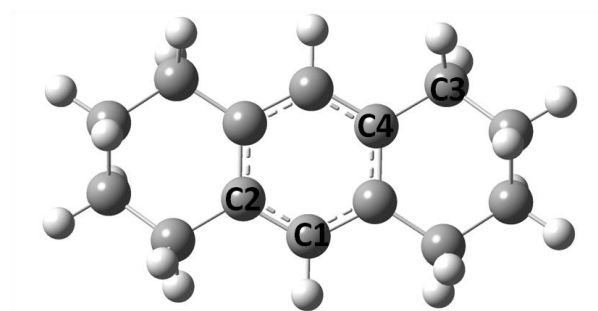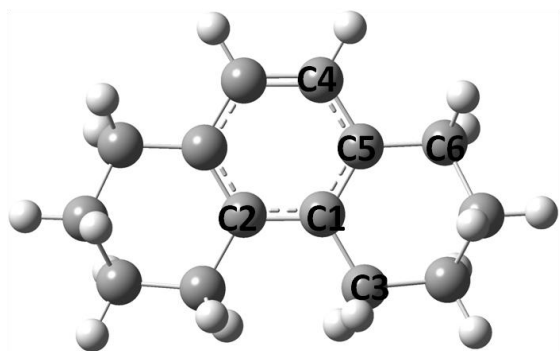

**(b)** reference structures for the “five-membered ring” mechanism

**Fig. S5** Optimized geometries of all the intermediate species included in the “six-membered ring” mechanism of ring-shift isomerization of *sym*-OHP into *sym*-OHA catalyzed by the 120T Al-H-MOR. Only the adsorbates and 14T quantum region are shown for clarity.

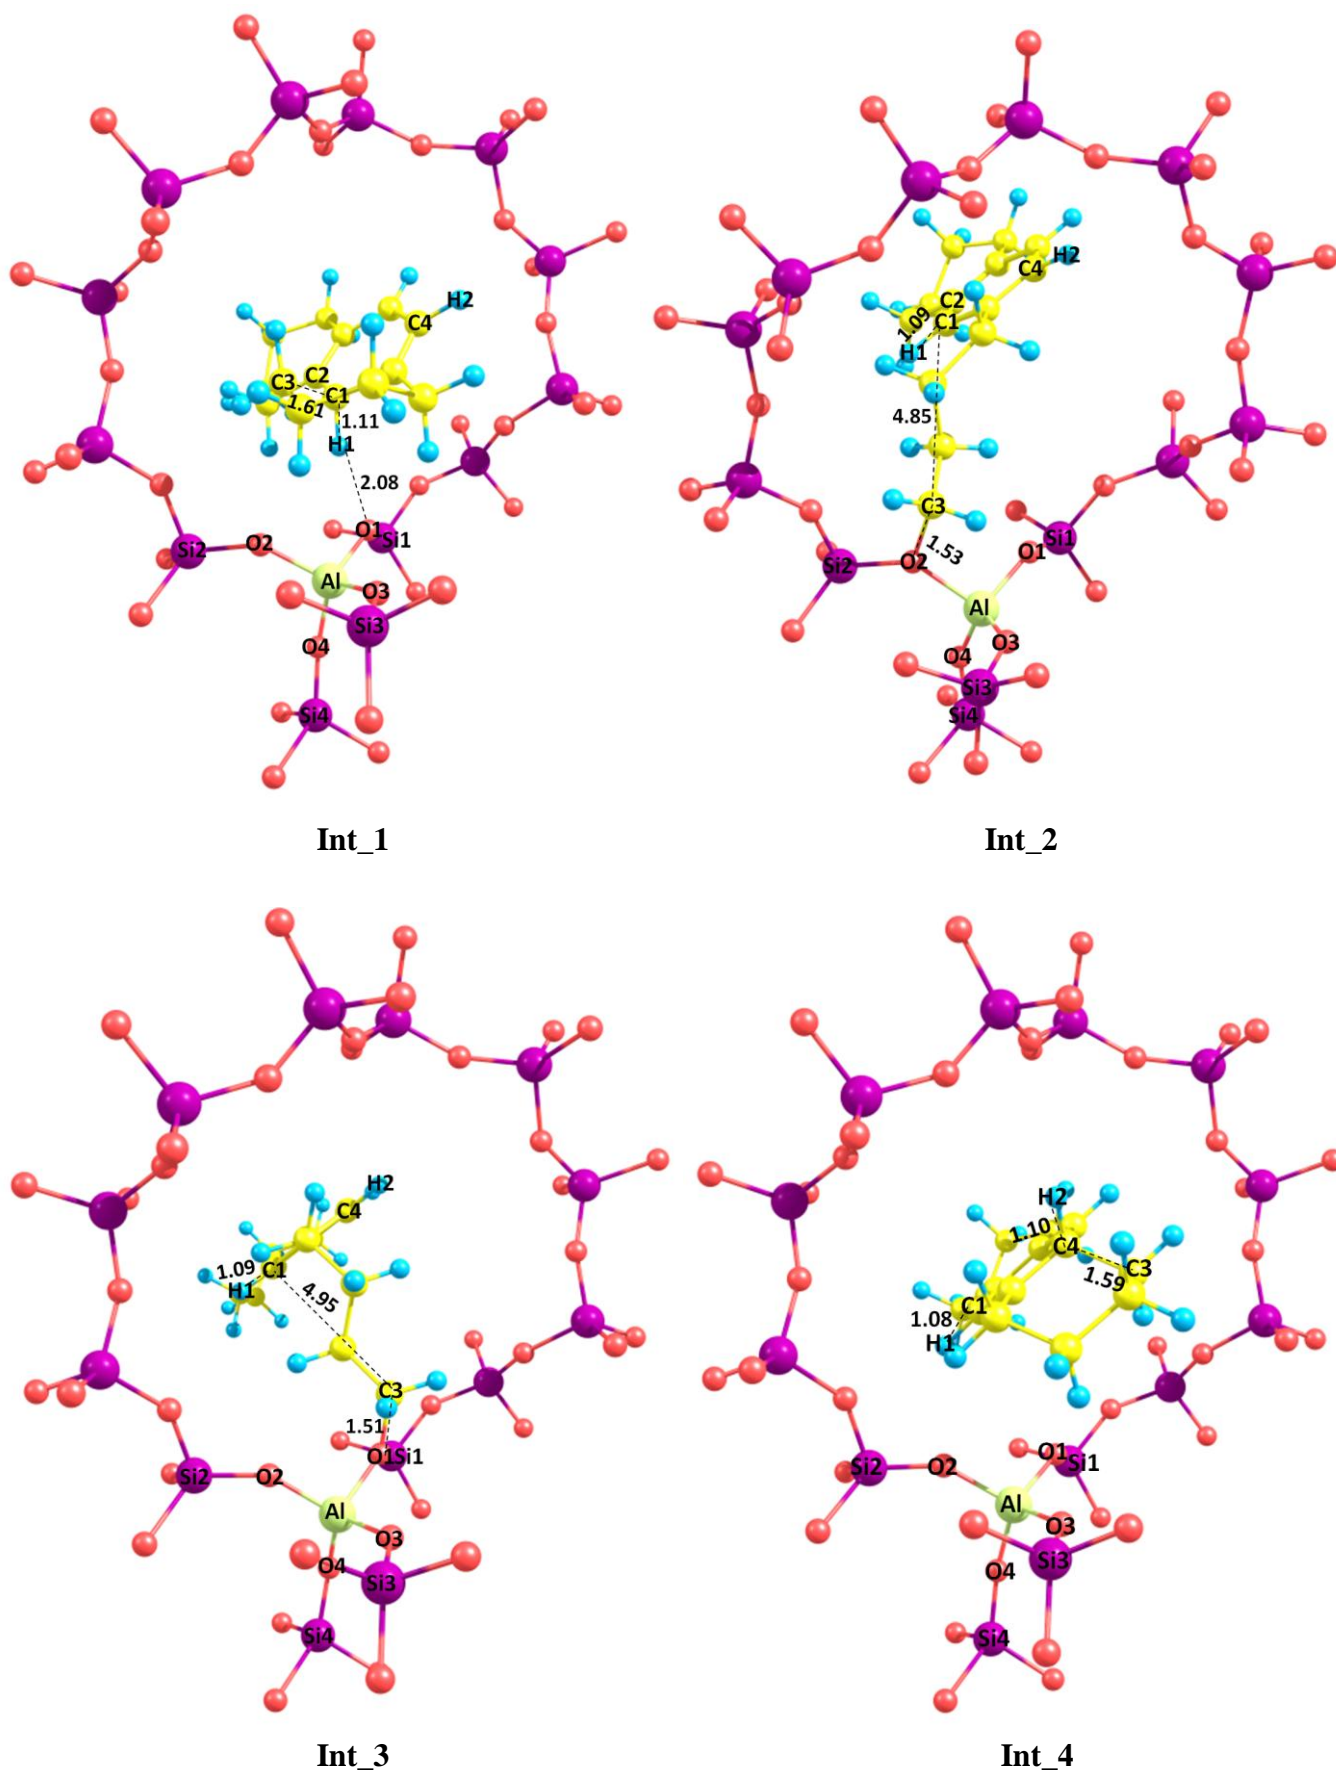

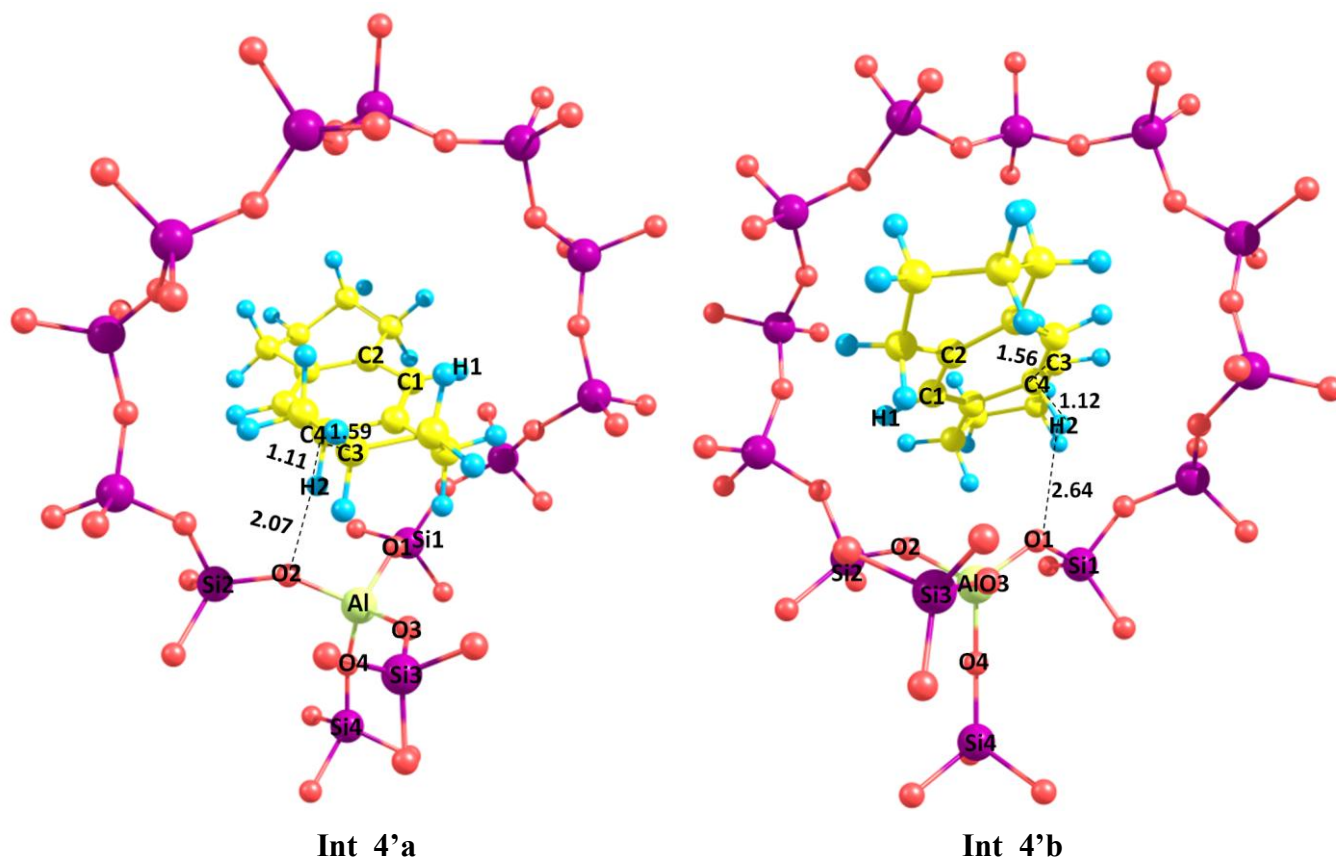

**Fig. S6** Energy profiles based on the “six-membered ring” and “five-membered ring” mechanisms with the 120T Al-H-MOR starting and ending with the adsorbed states calculated with the B3PW91 and PBE functionals.

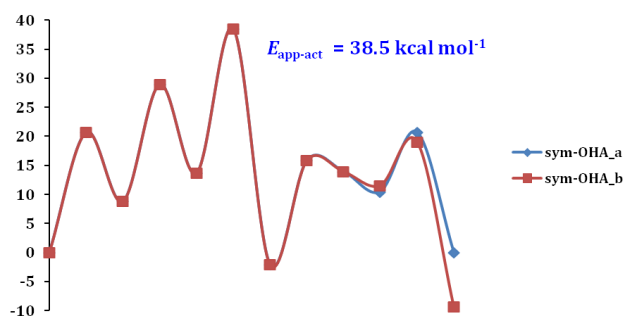

(a) with B3PW91 functional (six-membered ring mechanism)

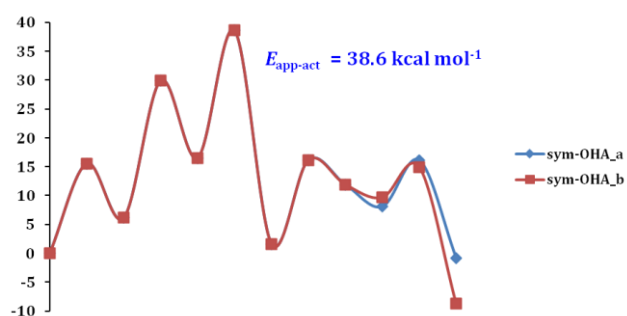

(b) with PBE functional (six-membered ring mechanism)

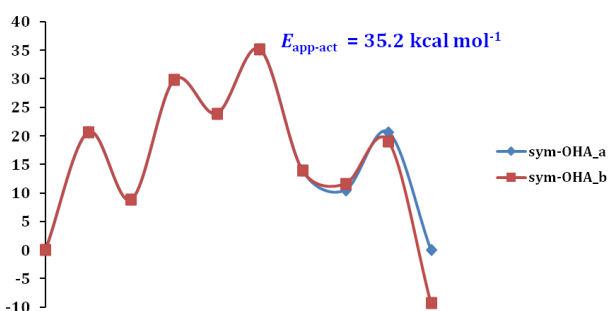

(c) with B3PW91 functional (five-membered ring mechanism)

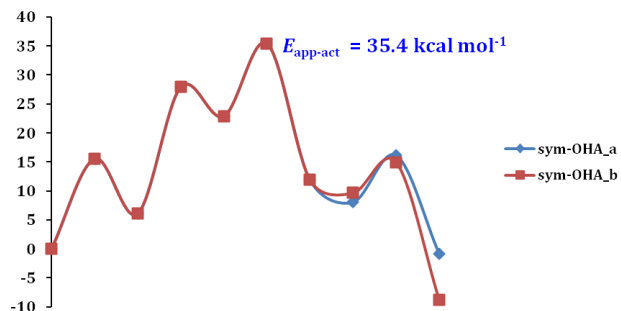

(d) with PBE functional (five-membered ring mechanism)

**Fig. S7** Energy profiles for the proposed “six-membered ring” and “five-membered ring” mechanisms with the 120T Al-H-MOR starting and ending with the adsorbed states computed with 6-311g(d,p) and 6-311+g(d,p) basis sets.

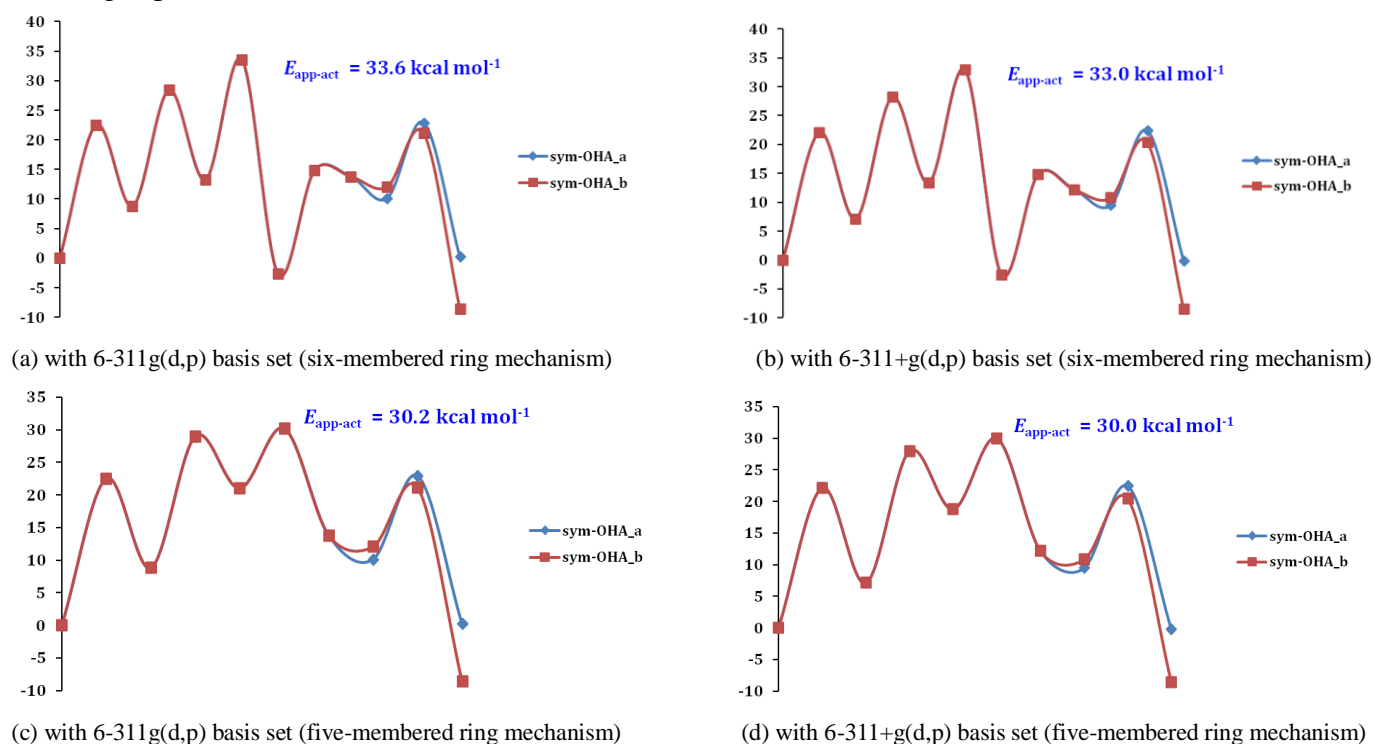

**Fig. S8** Optimized geometries of all the stationary points and transition states included in the both mechanisms of ring-shift isomerization of *sym*-OHP into *sym*-OHA catalyzed by the 140T Al-H-FAU. Only the adsorbates and 14T quantum region are shown for clarity.

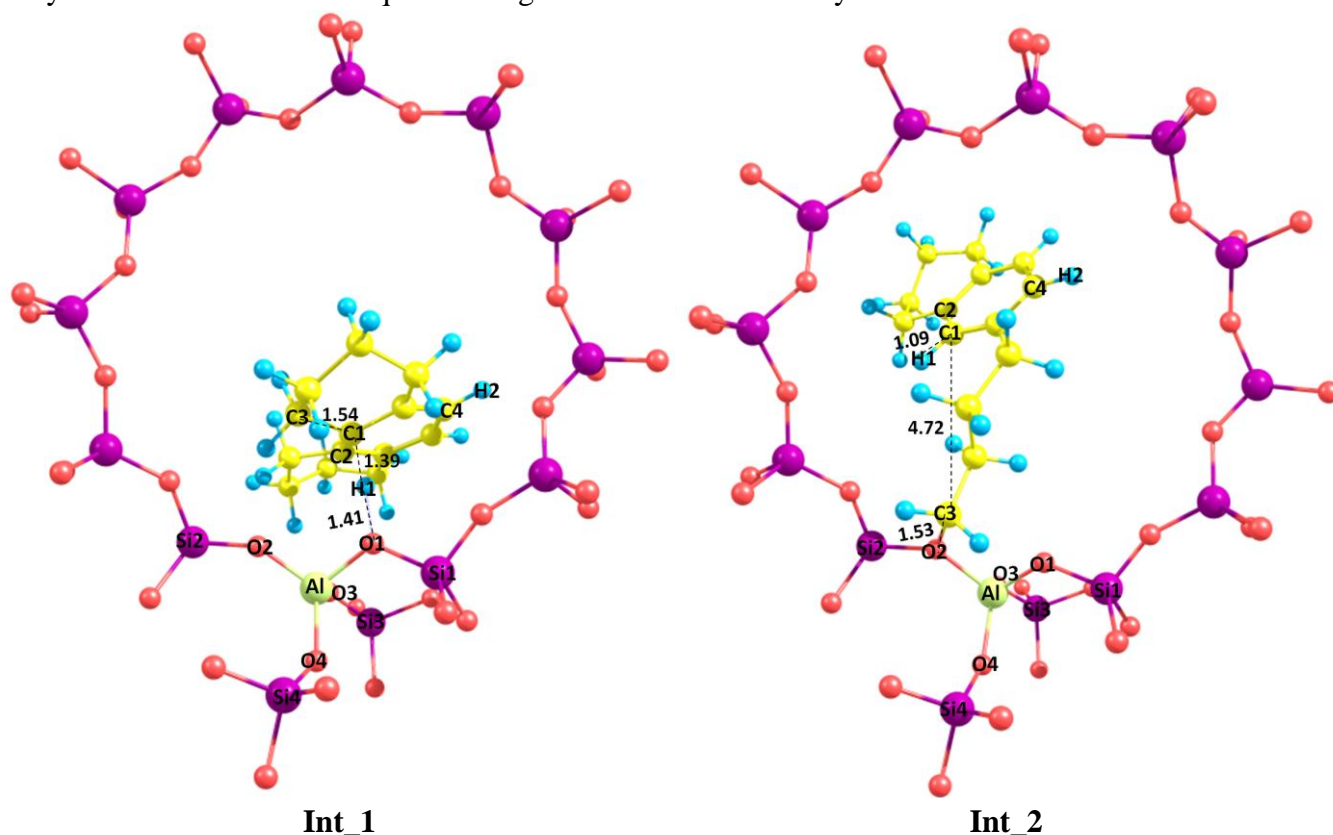

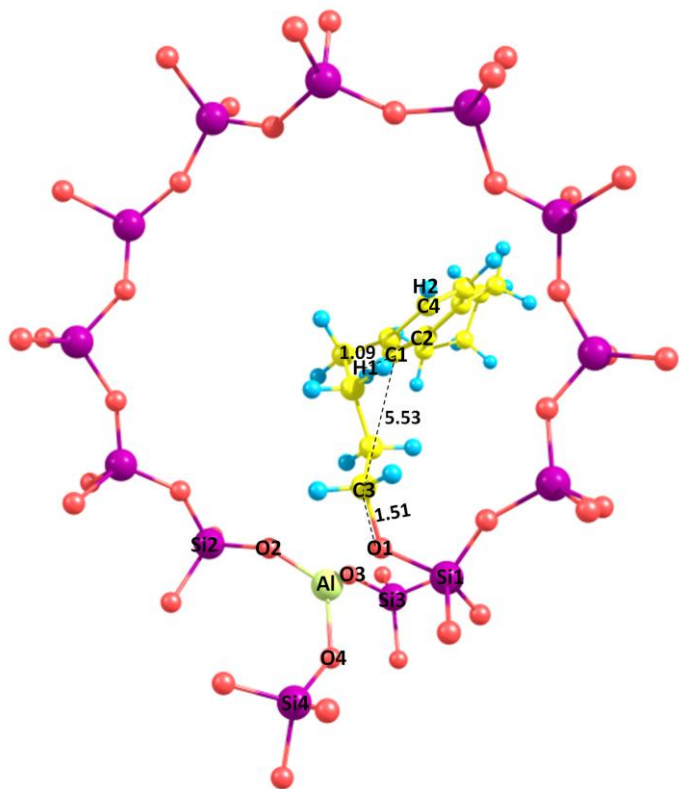

Int\_3

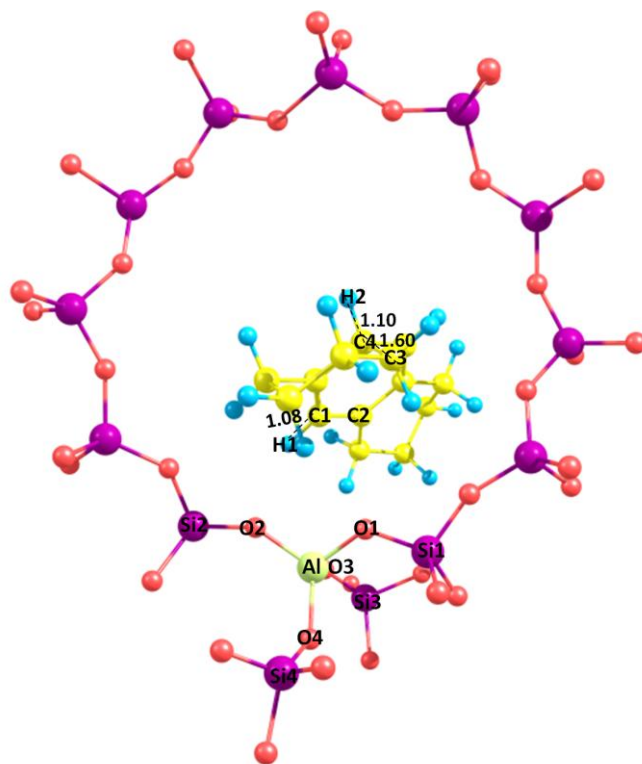

Int\_4

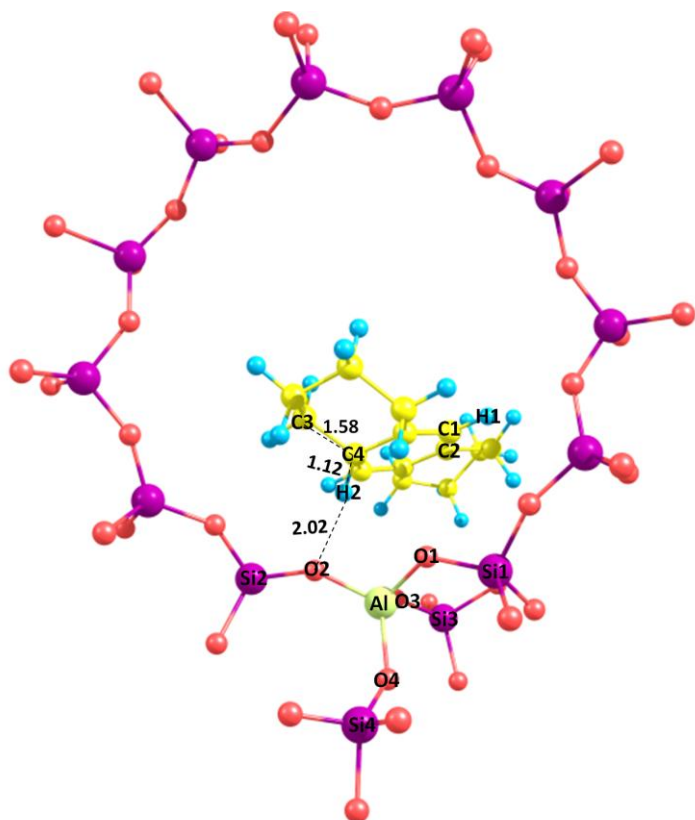

Int\_4'a

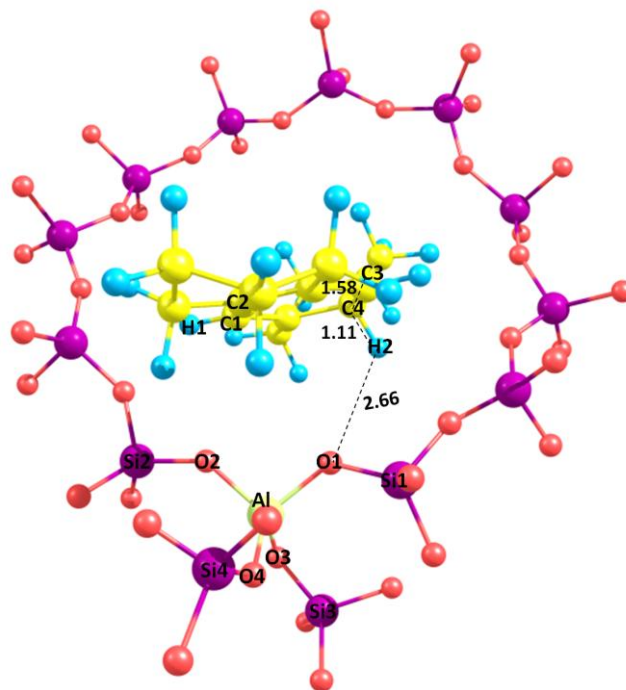

Int\_4'b

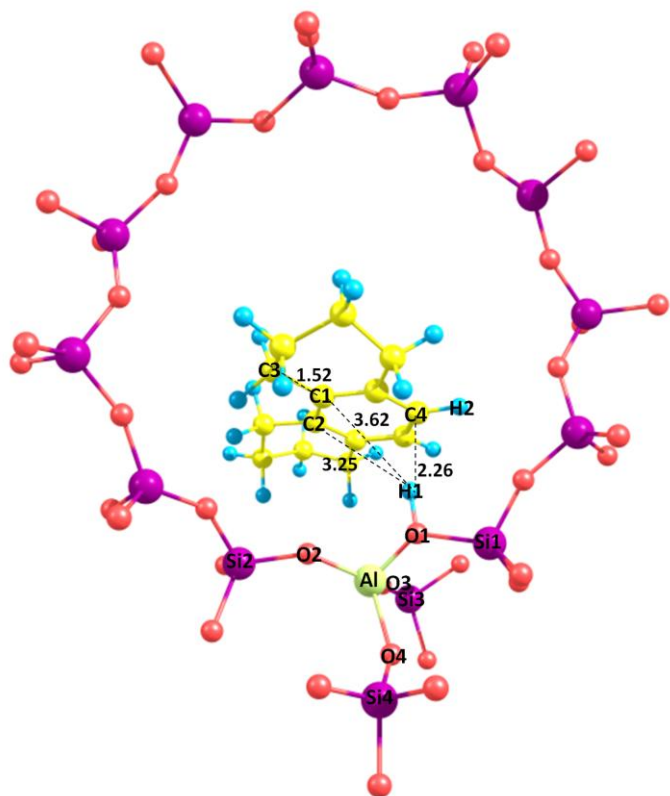

**Ads\_sym-OHP**

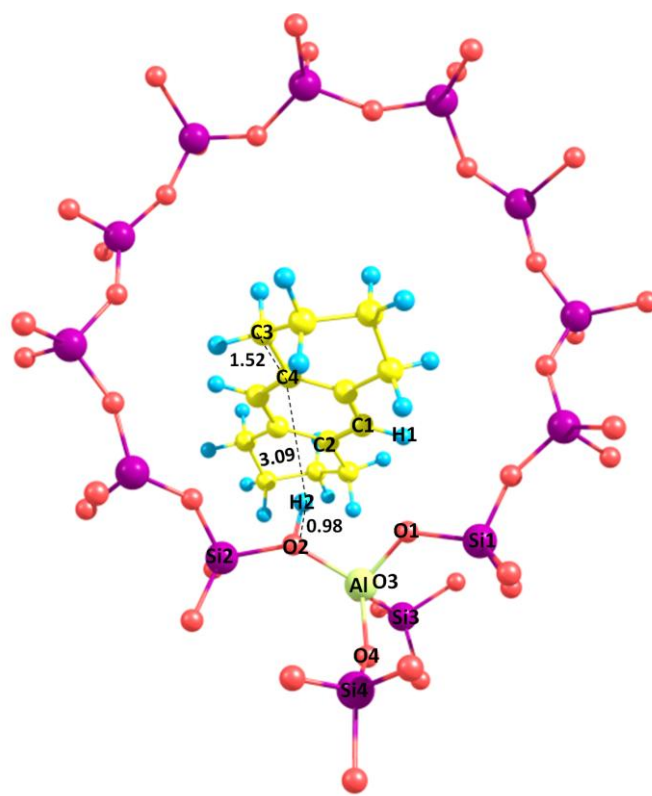

**Ads\_sym-OHA\_a**

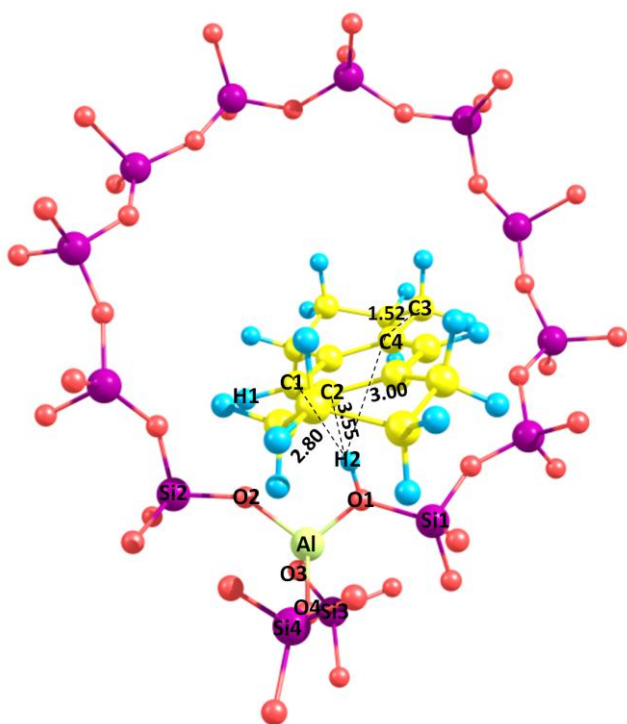

**Ads\_sym-OHA\_b**

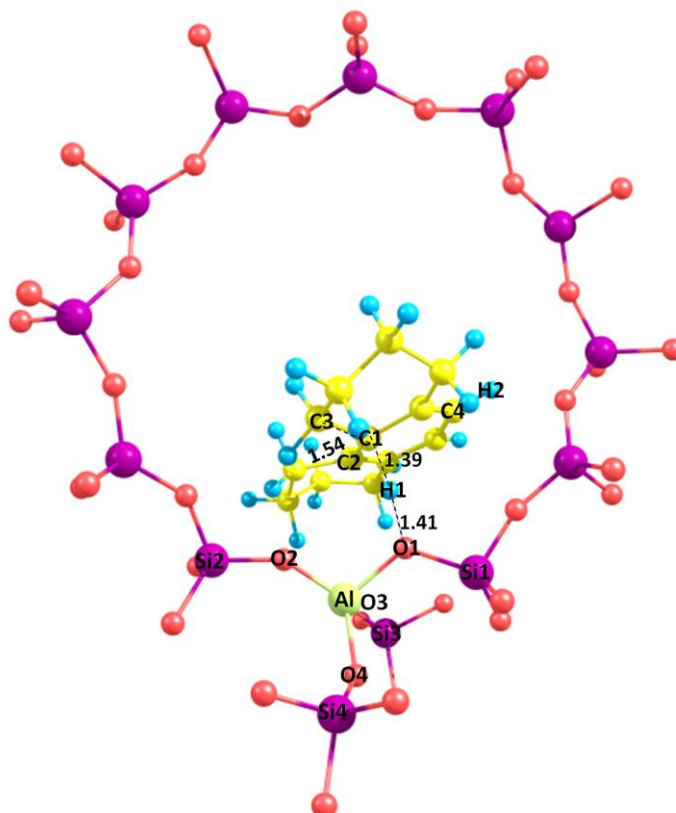

**TS\_1**

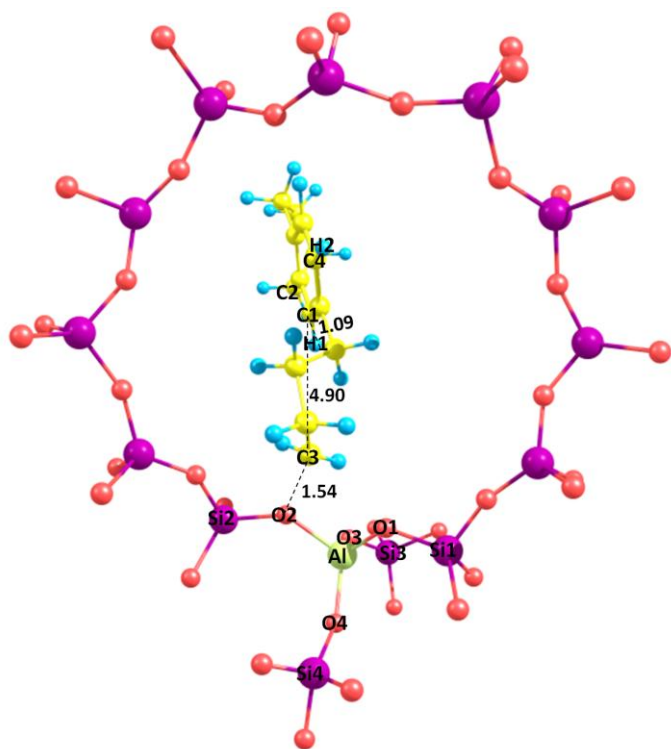

TS\_2

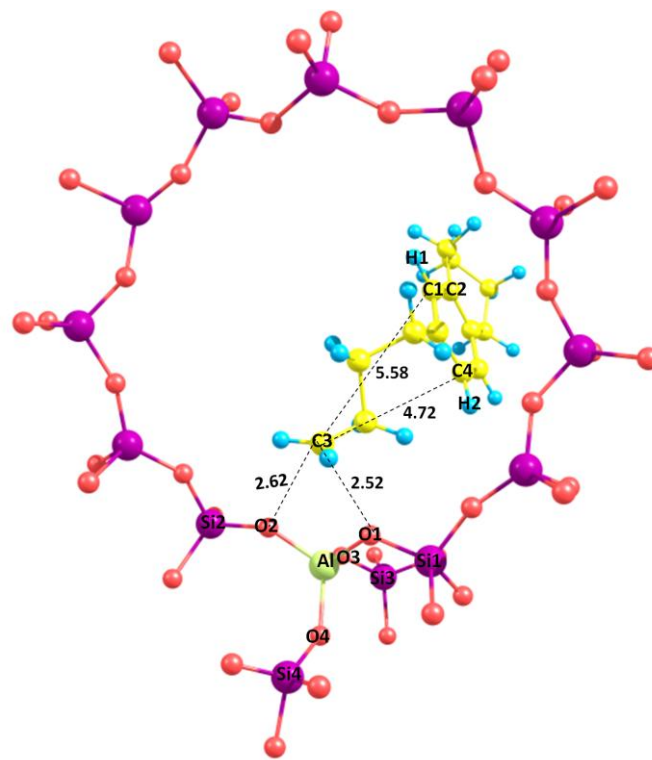

TS\_3

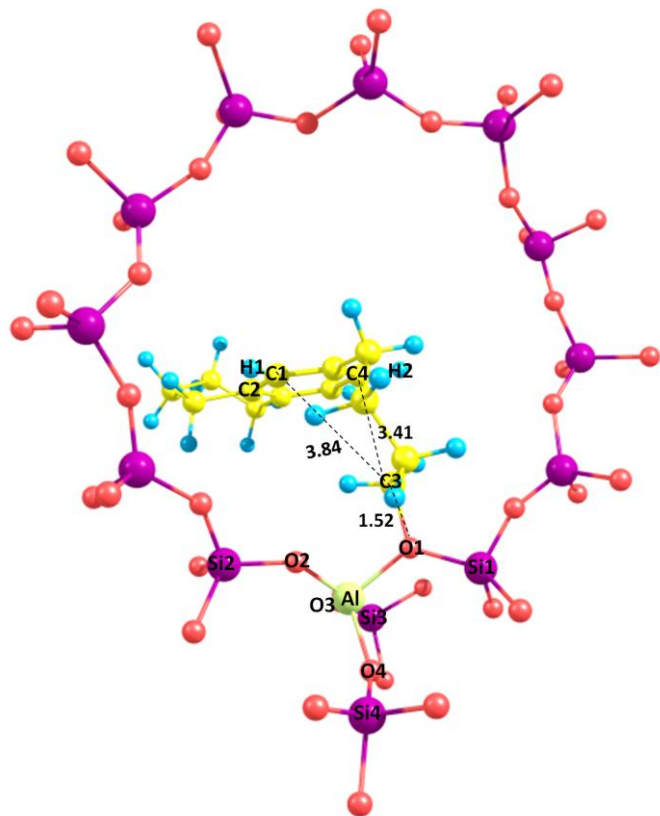

TS\_4

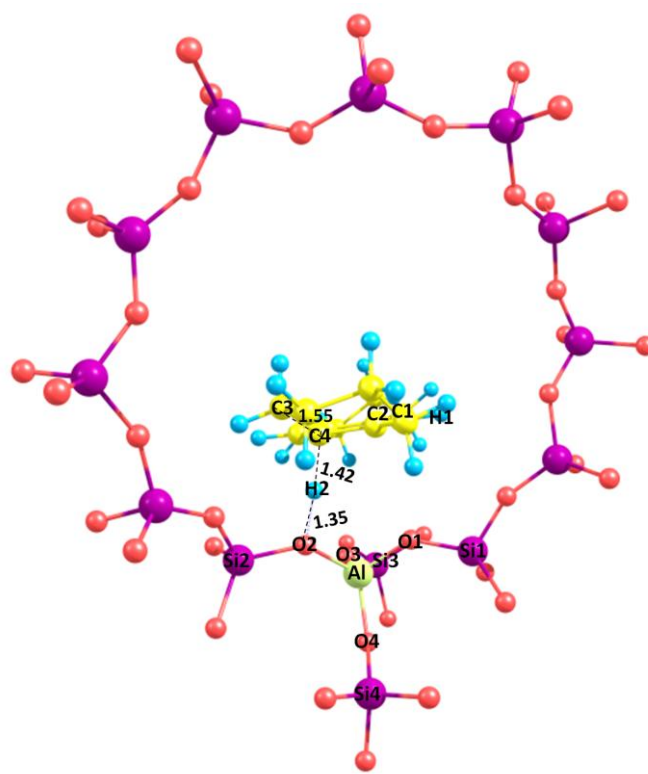

TS\_5a



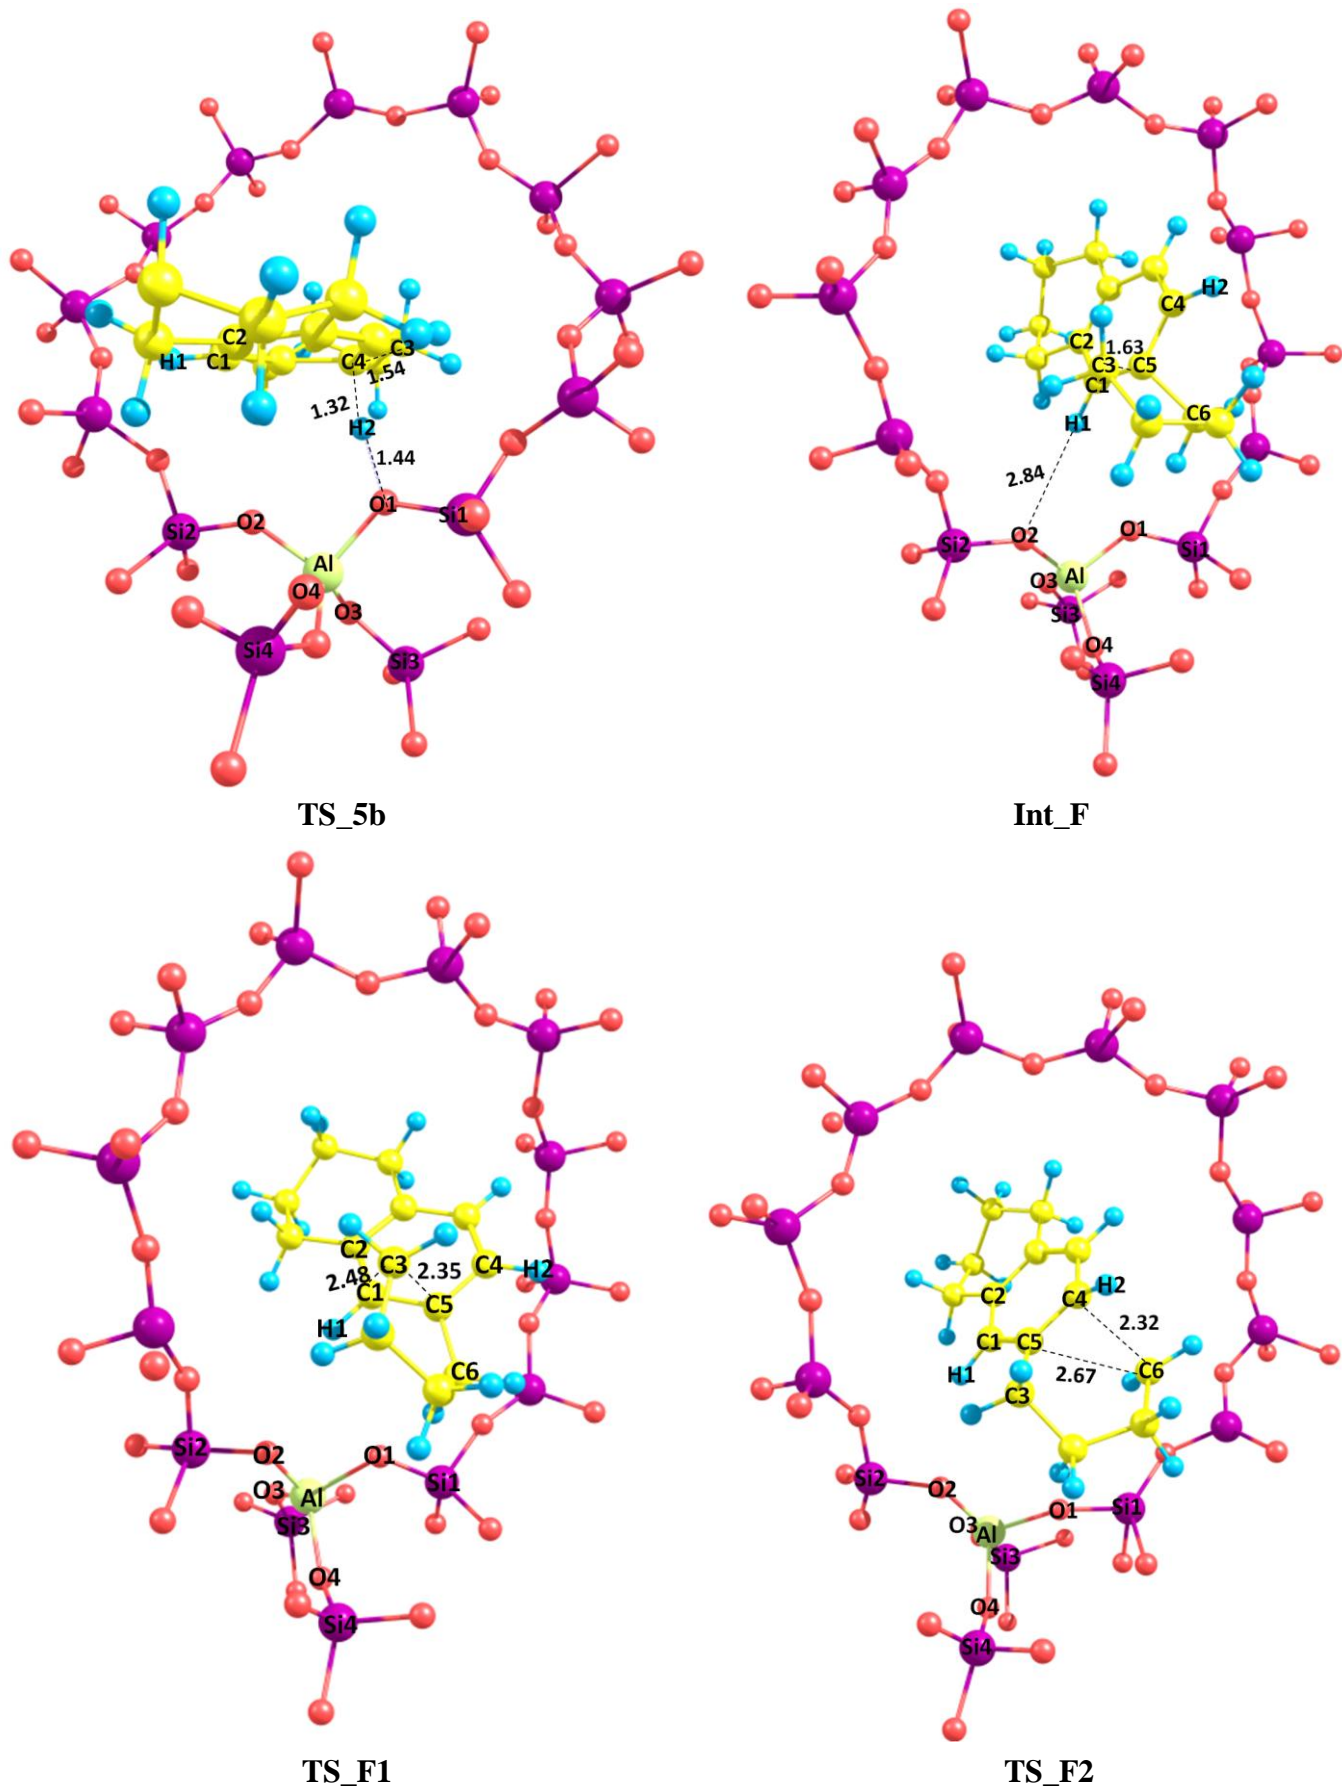

**Fig. S9** Relative energy profiles for ring-shift isomerization of *sym*-OHP into *sym*-OHA in the “six-membered ring” mechanism catalyzed by the 120T B-H-MOR, Ga-H-MOR, and 140T Al-H-FAU.

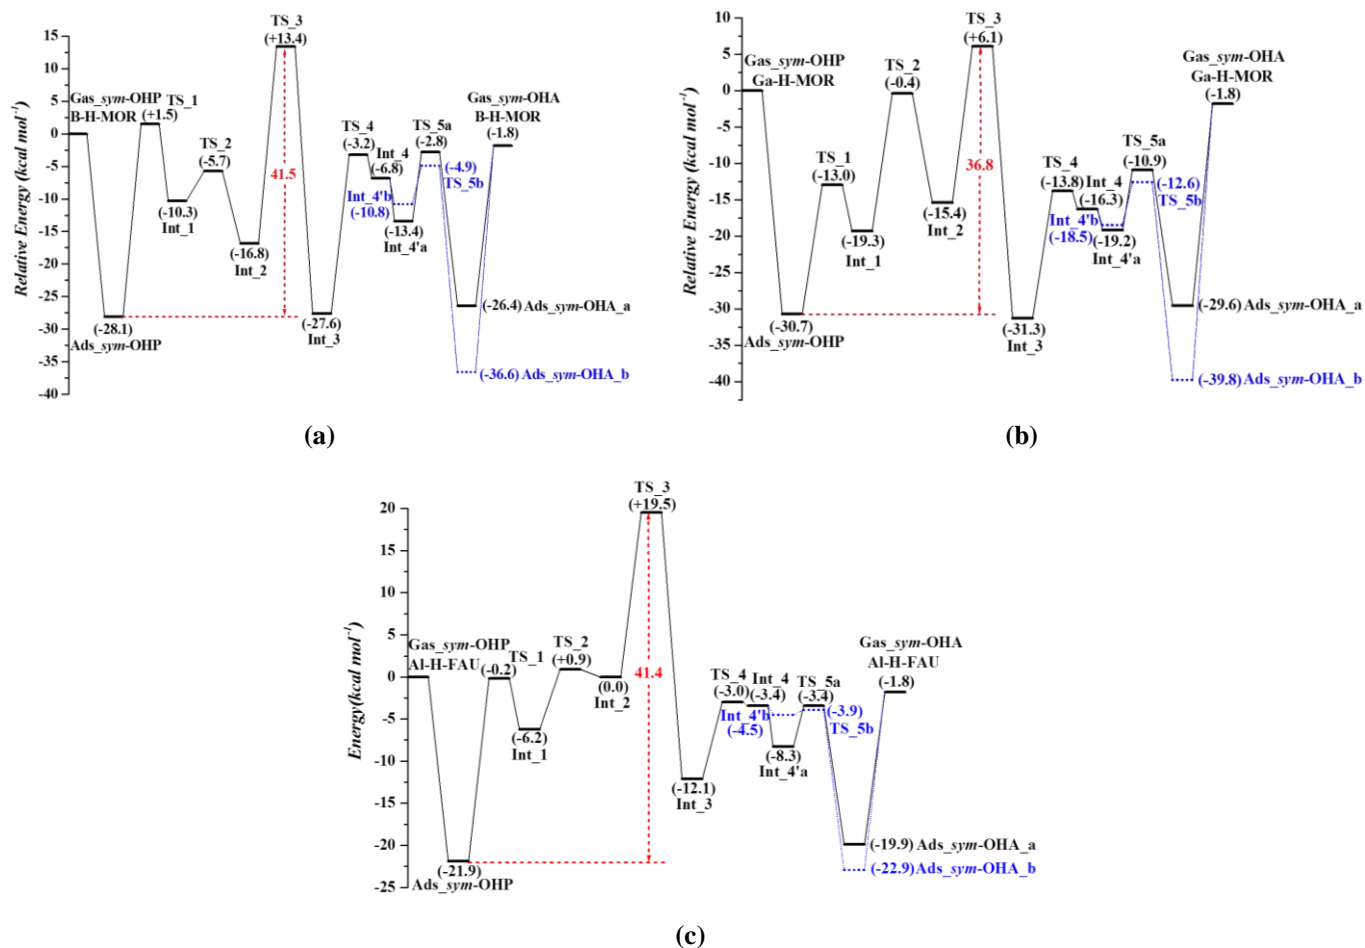

**Fig. S10** Calculated equilibrium compositions (%) of the *sym*-OHP and *sym*-OHA conformers in the temperature range of 175 to 325 °C.

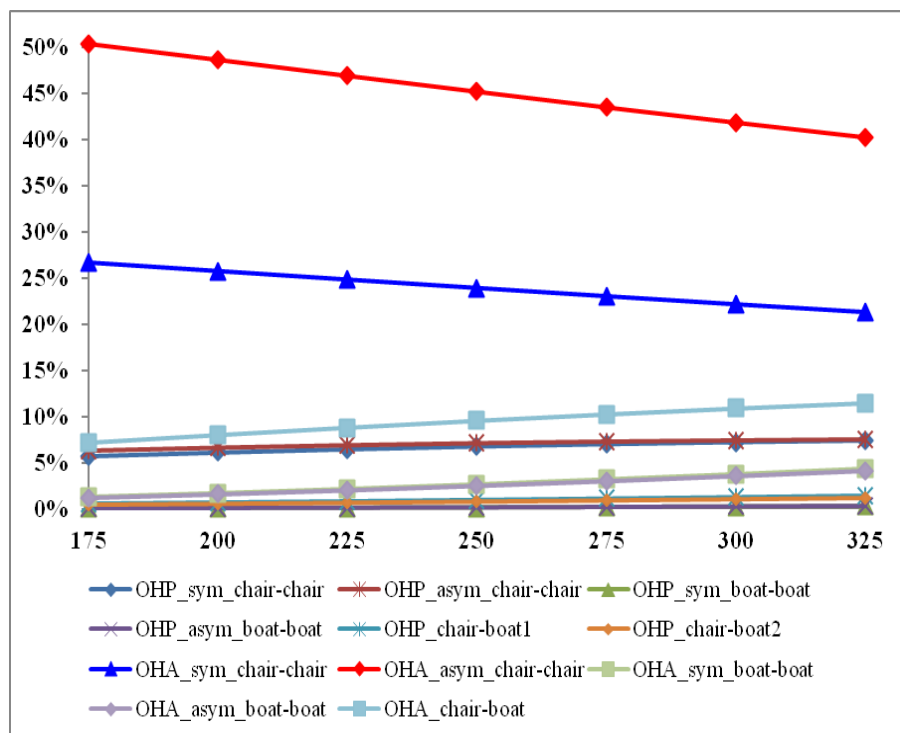

**Table S1** Key geometric parameters of the optimized *sym*-OHP and *sym*-OHA adsorption states with both the DFT(B3LYP) and ONIOM(B3LYP:UFF) approaches.

| Geometric parameter                 | <i>sym</i> -OHP |                  | <i>sym</i> -OHA |                  |
|-------------------------------------|-----------------|------------------|-----------------|------------------|
|                                     | DFT(B3LYP)      | ONIOM(B3LYP:UFF) | DFT(B3LYP)      | ONIOM(B3LYP:UFF) |
| C <sub>1</sub> -C <sub>2</sub>      | 1.42            | 1.42             | 1.41            | 1.40             |
| C <sub>1</sub> -C <sub>3</sub>      | 1.52            | 1.52             | 3.83            | 3.83             |
| C <sub>1</sub> -H <sub>1</sub>      | 3.17            | 3.12             | 1.09            | 1.09             |
| C <sub>2</sub> -H <sub>1</sub>      | 3.45            | 3.41             | 2.15            | 2.15             |
| C <sub>4</sub> -H <sub>2</sub>      | 1.08            | 1.08             | 3.78            | 3.74             |
| O <sub>1</sub> -H <sub>1</sub>      | 0.98            | 0.97             | 3.27            | 3.22             |
| O <sub>1</sub> -Al                  | 1.84            | 1.80             | 1.84            | 1.80             |
| O <sub>1</sub> -Si <sub>1</sub>     | 1.68            | 1.67             | 1.68            | 1.67             |
| O <sub>2</sub> -Al                  | 1.68            | 1.65             | 1.68            | 1.66             |
| O <sub>2</sub> -Si <sub>2</sub>     | 1.59            | 1.57             | 1.59            | 1.57             |
| Si <sub>1</sub> -O <sub>1</sub> -Al | 129.1           | 125.8            | 128.4           | 125.2            |
| Si <sub>2</sub> -O <sub>2</sub> -Al | 148.1           | 145.9            | 148.9           | 146.7            |
| Si <sub>3</sub> -O <sub>3</sub> -Al | 132.5           | 131.5            | 132.6           | 131.5            |
| Si <sub>4</sub> -O <sub>4</sub> -Al | 156.8           | 154.0            | 156.8           | 154.0            |

**Table S2** The evaluations of the ONIOM(DFT/UFF) energies on the adsorbed reactant (*sym*-OHP), intermediate species, and the adsorbed product (*sym*-OHA) over the 120T Al-H-MOR. Energies are given in Hartree.

| Species           | ONIOM(DFT:UFF)    |
|-------------------|-------------------|
|                   | $\Delta S$ -value |
| <i>sym</i> -OHP   | 0.03958330        |
| Int_1             | 0.04049951        |
| Int_2             | 0.04040031        |
| Int_3             | 0.03918137        |
| Int_4             | 0.04004935        |
| Int_4'a           | 0.04272292        |
| Int_4'b           | 0.04417378        |
| <i>sym</i> -OHA_a | 0.03998476        |
| <i>sym</i> -OHA_b | 0.03977902        |

**Table S3** The adsorption stability of all the possible adsorbed structures of *sym*-OHP and *sym*-OHA over the 120T Al-H-MOR. Energies are given in kcal mol<sup>-1</sup>.

| <i>sym</i> -OHP            |                 |                          |                 |               |                 |
|----------------------------|-----------------|--------------------------|-----------------|---------------|-----------------|
| Structure                  | Relative Energy | Structure                | Relative Energy | Structure     | Relative Energy |
| <i>sym</i> -Chair-Chair(1) | 0.29            | <i>sym</i> -Boat-Boat(1) | 6.11            | Chair-Boat(1) | 3.06            |
| <i>sym</i> -Chair-Chair(2) | 1.19            | <i>sym</i> -Boat-Boat(2) | 5.39            | Chair-Boat(2) | 2.95            |
| asym-Chair-Chair(1)        | 0.18            | asym-Boat-Boat(1)        | 5.12            | Chair-Boat(3) | 3.16            |
| asym-Chair-Chair(2)        | 0               | asym-Boat-Boat(2)        | 5.05            | Chair-Boat(4) | 3.17            |
| Chair-Boat(5)              | 3.34            | Chair-Boat(6)            | 3.01            | Chair-Boat(7) | 3.55            |

|                       |                 |                   |                 |               |                 |
|-----------------------|-----------------|-------------------|-----------------|---------------|-----------------|
| Chair-Boat(8)         | 3.54            |                   |                 |               |                 |
| <b><i>sym</i>-OHA</b> |                 |                   |                 |               |                 |
| Structure             | Relative Energy | Structure         | Relative Energy | Structure     | Relative Energy |
| sym-Chair-Chair(1)    | 0               | sym-Boat-Boat(1)  | 6.46            | Chair-Boat(1) | 3.15            |
| sym-Chair-Chair(2)    | 0.57            | sym-Boat-Boat(2)  | 6.09            | Chair-Boat(2) | 2.64            |
| asym-Chair-Chair(1)   | 0.30            | asym-Boat-Boat(1) | 6.08            | Chair-Boat(3) | 3.28            |
| asym-Chair-Chair(2)   | 0.18            | asym-Boat-Boat(2) | 5.33            | Chair-Boat(4) | 2.68            |

**Table S4** Imaginary vibrational modes for all the transition states created in the “six-membered ring” and “five-membered ring” mechanisms of ring-shift isomerization of *sym*-OHP into *sym*-OHA over different acidic zeolite catalysts.

| Transition States | Al-H-MOR                                            | B-H-MOR  | Ga-H-MOR | Al-H-FAU |
|-------------------|-----------------------------------------------------|----------|----------|----------|
|                   | imaginary vibrational frequency (cm <sup>-1</sup> ) |          |          |          |
| <b>TS_1</b>       | -1431.84                                            | -1508.27 | -1379.66 | -1233.68 |
| <b>TS_2</b>       | -158.71                                             | -169.16  | -133.42  | -168.97  |
| <b>TS_3</b>       | -249.36                                             | -289.39  | -230.28  | -207.27  |
| <b>TS_4</b>       | -111.88                                             | -304.16  | -206.64  | -99.81   |
| <b>TS_5a</b>      | -1388.36                                            | -889.62  | -1332.95 | -1315.41 |
| <b>TS_5b</b>      | -1220.18                                            | -998.05  | -1216.68 | -883.45  |
| <b>TS_F1</b>      | -286.07                                             | -273.15  | -289.53  | -301.21  |
| <b>TS_F2</b>      | -296.20                                             | -300.78  | -299.75  | -310.98  |
